# Supplementary material for: Absence of N-terminal acetyltransferase diversification during evolution of eukaryotic organisms
Source: PubMed Central journal article supplement (PMC4748286; doi:10.1038/srep21304), 2016-02-10
Supplement: srep21304-s1.pdf [file srep21304-s1.pdf]

**Absence of N-terminal acetyltransferase diversification during evolution of eukaryotic organisms.**

Om Singh Rathore<sup>1,2,3</sup>, Alexandra Faustino<sup>1,2</sup>, Pedro Prudêncio<sup>1,2,5</sup>, Petra Van Damme<sup>6,7</sup>, Cymon J. Cox<sup>4</sup>, Rui Gonçalo Martinho<sup>1,2,5,#</sup>.

<sup>1</sup>Department of Biomedical Sciences and Medicine, <sup>2</sup>Center for Biomedical Research (CBMR), <sup>3</sup>ProRegeM - PhD Program in Mechanisms of Disease and Regenerative Medicine, <sup>4</sup>Center of Marine Sciences, University of Algarve, Faro, Portugal; <sup>5</sup>Instituto Gulbenkian de Ciência, Rua da Quinta Grande 6, Oeiras 2781-901, Portugal; <sup>6</sup>Department of Medical Protein Research, VIB, B-9000 Ghent, Belgium; <sup>7</sup>Department of Biochemistry, Ghent University, B-9000 Ghent, Belgium

# To whom correspondence should be addressed:

Email: rgmartinho@ualg.pt





Supplementary Figure 2

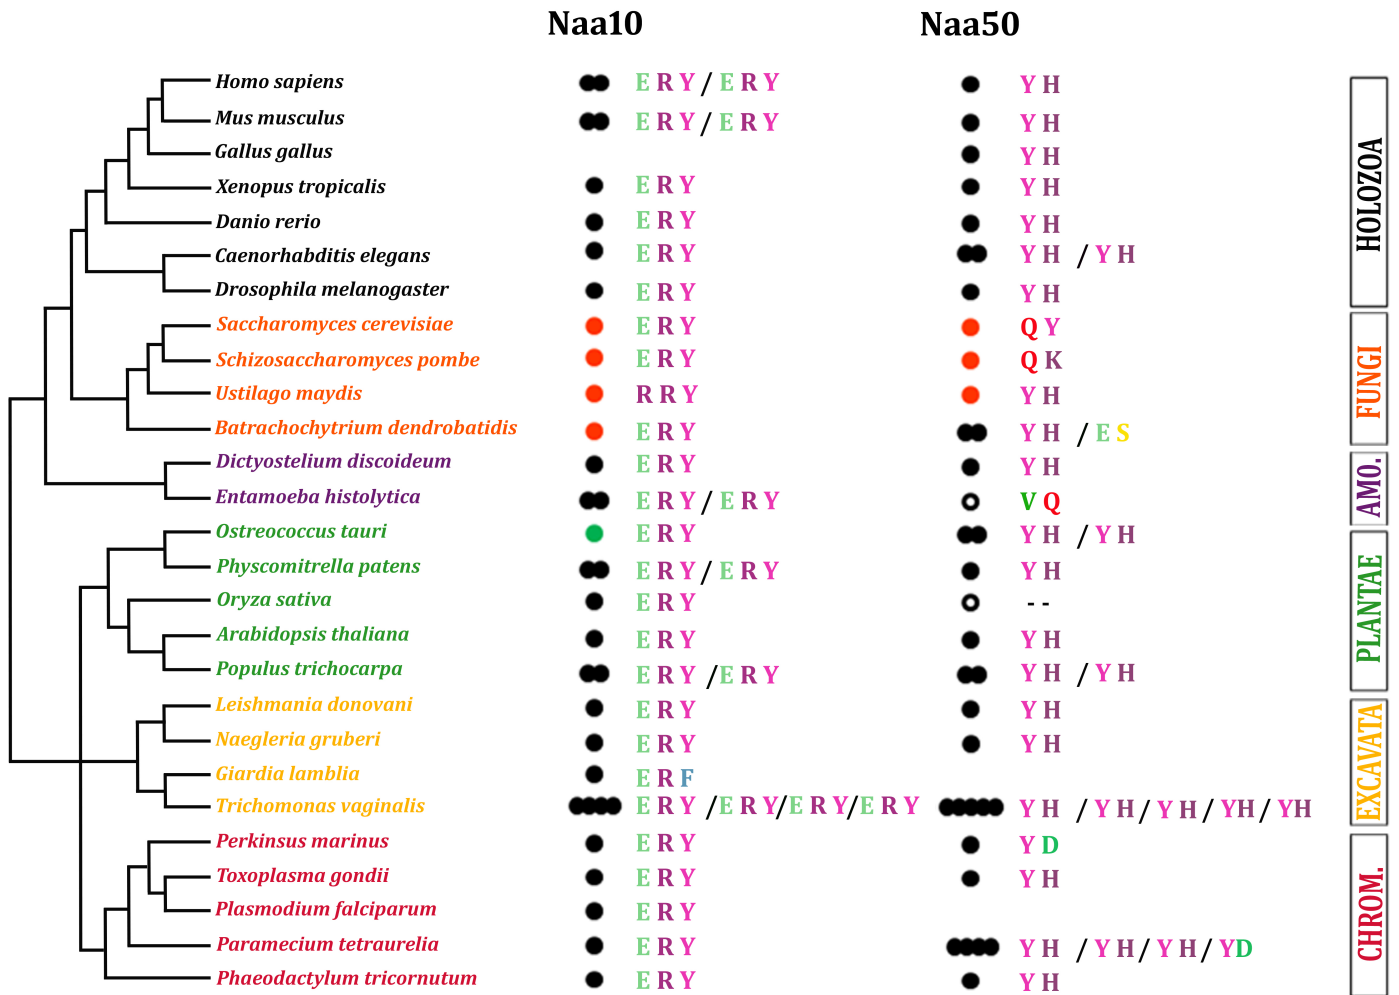

Supplementary Figure 3

Naa10

Naa50

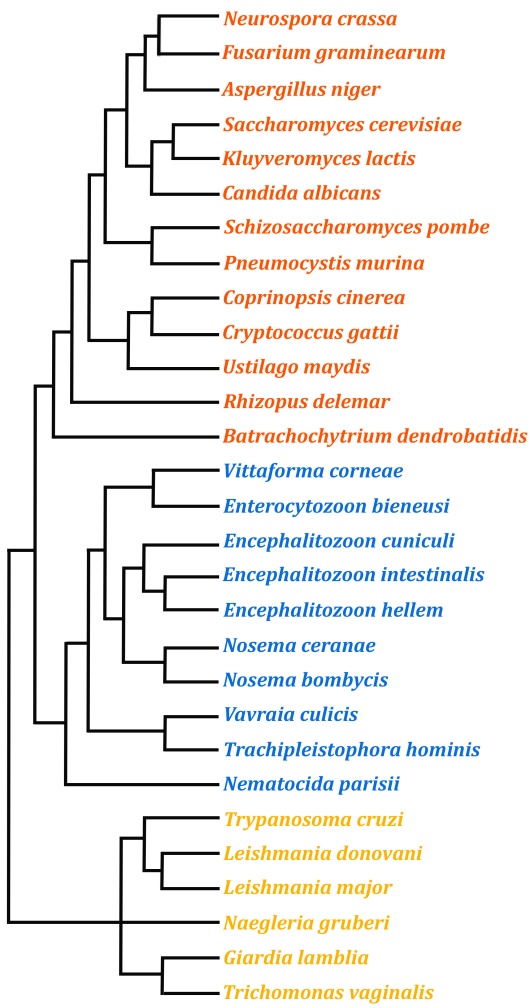

| Species                               | Naa10                | Naa50                       |
|---------------------------------------|----------------------|-----------------------------|
| <i>Neurospora crassa</i>              | ● ERY                | ● YH                        |
| <i>Fusarium graminearum</i>           | ● ERY                | ● YH                        |
| <i>Aspergillus niger</i>              | ● ERY                | ○ YH                        |
| <i>Saccharomyces cerevisiae</i>       | ● ERY                | ● QY                        |
| <i>Kluyveromyces lactis</i>           | ● ERY                | ● YH                        |
| <i>Candida albicans</i>               | ● ERY                | ● YH                        |
| <i>Schizosaccharomyces pombe</i>      | ● ERY                | ● QK                        |
| <i>Pneumocystis murina</i>            | ● ERY                | ● YH                        |
| <i>Coprinopsis cinerea</i>            | ● ERY                | ● YH                        |
| <i>Cryptococcus gattii</i>            | ● ERY                | ○ YH                        |
| <i>Ustilago maydis</i>                | ● RRY                | ● YH                        |
| <i>Rhizopus delemar</i>               | ● ERY                | ● YH / SF                   |
| <i>Batrachochytrium dendrobatidis</i> | ● ERY                | ● YH / ES                   |
| <i>Vittaforma corneae</i>             | ○ DSY                | ● YH                        |
| <i>Enterocytozoon bieneusi</i>        | ○ DSF                | ○ YY                        |
| <i>Encephalitozoon cuniculi</i>       | ○ ERY                | ● YY                        |
| <i>Encephalitozoon intestinalis</i>   | ○ ERY                |                             |
| <i>Encephalitozoon hellem</i>         | ○ ERY                |                             |
| <i>Nosema ceranae</i>                 | ○ ERY                | ● YH                        |
| <i>Nosema bombycis</i>                | ○ ERY                | ○ YY                        |
| <i>Vavraia culicis</i>                | ○ ERY                | ● YH                        |
| <i>Trachipleistophora hominis</i>     | ● E - -              | ● - H                       |
| <i>Nematocida parisii</i>             | ● ERY                | ● YH                        |
| <i>Trypanosoma cruzi</i>              | ● ERY                | ● YH                        |
| <i>Leishmania donovani</i>            | ● ERY                | ● YH                        |
| <i>Leishmania major</i>               | ● ERY                | ● YH                        |
| <i>Naegleria gruberi</i>              | ● ERY                | ● YH                        |
| <i>Giardia lamblia</i>                | ● ERF                | ● YH                        |
| <i>Trichomonas vaginalis</i>          | ●●●● ERY/ERY/ERY/ERY | ●●●● YH / YH / YH / YH / YH |

FUNGI

MICROSPORIDIA

EXCAVATA

Supplementary Figure 4

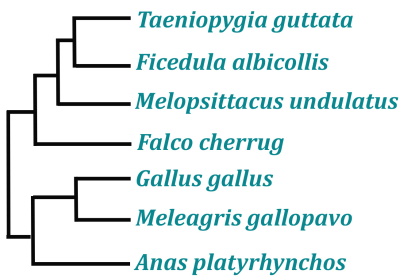

| Nat A |       | Nat B |       | Nat C |       | Nat D | Nat E | Nat F |
|-------|-------|-------|-------|-------|-------|-------|-------|-------|
| Naa10 | Naa15 | Naa20 | Naa25 | Naa30 | Naa35 | Naa40 | Naa50 | Naa60 |
|       | ●●    | ●     | ●     | ●     | ●     | ●     | ●     | ●     |
|       | ●●    | ●     | ●     | ●     | ●     | ●     | ●     | ●     |
|       | ●●    | ●     | ●     | ●     | ●     | ●     | ●     | ●     |
| ●     | ●●    | ●     | ●     | ●     | ●     | ●     | ●     | ●     |
|       | ●●    | ●     | ●     | ●     | ●     |       | ●     | ●     |
| ●     | ●●    | ●     | ●     | ●     | ●     |       | ●     | ●     |

BIRDS



Supplementary Table 1

|                                | Nat A                             |                                   | Nat B          |                | Nat C          |                | Nat D          | Nat E          | Nat F          |
|--------------------------------|-----------------------------------|-----------------------------------|----------------|----------------|----------------|----------------|----------------|----------------|----------------|
|                                | Naa10/11                          | Naa15/16                          | Naa20          | Naa25          | Naa30          | Naa35          | Naa40          | Naa50          | Naa60          |
| <b>HOLOZOA</b>                 |                                   |                                   |                |                |                |                |                |                |                |
| <i>Homo sapiens</i>            | NP_003482.1/<br>NP_116082.1       | NP_476516.1/<br>NP_078837.3       | NP_057184.1    | NP_079229.2    | NP_001011713.2 | NP_078911.3    | NP_079047.2    | NP_079422.1    | NP_079121.1    |
| <i>Macaca mulatta</i>          | XP_001089324.2/<br>NP_001180830.1 | NP_001245032.1/<br>NP_001253545.1 | XP_001091322.2 | XP_001102995.2 | NP_001253809.1 | NP_001181318.1 | XP_001118319.2 | NP_001248300.1 | NP_001253671.1 |
|                                | 1e-158/3e-170<br>2E-165/3e-158    | 0/0<br>0/0                        | 6e-94/3e-93    | 0/0            | 0/0            | 0/0            | 7e-153/2e-177  | 3E-124/1e-123  | 0/1e-179       |
| <i>Mus musculus</i>            | NP_063923.1/<br>NP_001028363.1    | NP_444319.3/<br>NP_080108.1       | NP_001135437.1 | NP_766310.2    | NP_001074899.1 | NP_084429.2    | NP_081919.1    | NP_082384.1    | NP_083366.1    |
|                                | 1e-161/2e-161<br>6E-137/4e-132    | 0/0<br>0/0                        | 4e-131/7e-131  | 0/0            | 2e-169/4e-172  | 0/0            | 2e-178/3e-178  | 7e-123/1e-122  | 3e-177/5e-177  |
| <i>Bos taurus</i>              | NP_001039976.1/<br>NP_001193340.1 | NP_001178248.1/<br>NP_001096570.1 | NP_001193758.1 | NP_001193056.1 | NP_001192966.1 | NP_001180040.1 | NP_001092474.1 | NP_001069218.1 | NP_001069117.1 |
|                                | 1E-165/7e-165<br>4E-155/4e-149    | 0/0<br>0/0                        | 2e-131/7e-131  | 0/0            | 0/0            | 0/0            | 1e-177/6e-177  | 3e-124/1e-123  | 8e-175/3e-174  |
| <i>Monodelphis domestica</i>   | XP_007507105.1                    | XP_001377801.1/<br>XP_001368680.2 | XP_001374084.1 | XP_001365908.1 | XP_003339539.1 | XP_003341702.1 | XP_001368911.2 | XP_001367592.1 | XP_001370249.1 |
|                                | 1e-146/7e-148                     | 0/0<br>0/0                        | 7e-131/5e-130  | 0/0            | 4e-162/3e-162  | 0/0            | 3e-169/8e-169  | 3e-120/2e-119  | 2e-172/2e-171  |
| <i>Taeniopygia guttata</i>     | -/-                               | XP_002191713.2<br>/XP_002196302.1 | NP_001232487.1 | XP_002193478.2 | XP_002200419.2 | XP_002191777.1 | XP_012432286.1 | XP_002186676.1 | XP_002195683.1 |
|                                |                                   | 0/0<br>0/0                        | 5e-130/6e-129  | 0/0            | 8e-124/1e-124  | 0/0            | 1e-87/8e-85    | 4e-121/4e-120  | 1e-169/1e-168  |
| <i>Ficedula albicollis</i>     | -/-                               | XP_005044911.1/<br>XP_005037896.1 | XP_005050761.1 | XP_005055325.1 | XP_005047886.1 | XP_005061005.1 | XP_005062675.1 | XP_005038535.1 | XP_005054206.1 |
|                                |                                   | 0/0<br>0/0                        | 7e-130/1e-75   | 0/0            | 2e-125/1e-124  | 0/0            | 3e-73/9e-78    | 1e-118/9e-118  | 1e-168/9e-168  |
| <i>Melopsittacus undulatus</i> | -/-                               | XP_005142434.1/<br>XP_005145707.1 | XP_005141365.1 | XP_005145220.1 | XP_005152409.1 | XP_005154988.1 | XP_005140525.1 | XP_005143088.1 | XP_005152549.1 |
|                                |                                   | 0/0<br>0/0                        | 3e-128/3e-127  | 0/0            | 1e-118/2e-122  | 0/0            | 5e-54/1e-53    | 1e-117/8e-116  | 5e-169/ 4e-167 |
| <i>Falco cherrug</i>           | XP_005447033.1                    | XP_005439245.1<br>/XP_005433302.1 | XP_005437001.1 | XP_005436785.1 | XP_005437971.1 | XP_005441431.1 | XP_005435899.1 | XP_005433422.1 | XP_005436827.1 |
|                                | 6e-111/1e-115                     | 0/0<br>0/0                        | 4e-104/4e-114  | 0/0            | 7e-115/1e-122  | 0/0            | 1e-96/2e-121   | 1e-119/2e-118  | 4e-170/5e-169  |

|                                      |                |                                   |                                   |                |                                |                |                                |                                    |                |
|--------------------------------------|----------------|-----------------------------------|-----------------------------------|----------------|--------------------------------|----------------|--------------------------------|------------------------------------|----------------|
| <i>Anas platyrhynchos</i>            | EOA93076.1     | XP_005022466.1/<br>XP_005037896.1 | XP_005031564.1                    | XP_005030368.1 | XP_005020924.1                 | XP_005017302.1 | -/-                            | XP_005021905.1                     | XP_005028567.1 |
|                                      | 1e-24/1e-24    | 0/0<br>0/0                        | 8e-25/6e-25                       | 0/0            | 1e-119/2e-125                  | 0/0            |                                | 3e-118/2e-117                      | 2e-169/1e-168  |
| <i>Gallus gallus</i>                 | -/-            | XP_420407.4/<br>XP_417028.2       | XP_004943128.1                    | NP_001025835.2 | XP_004936526.1                 | NP_001026623.1 | XP_003643576.2                 | NP_001025949.1                     | XP_414956.1    |
|                                      |                | 0/0<br>0/0                        | 1e-132/4e-133                     | 0/0            | 3e-119/2e-125                  | 0/0            | 4e-154/2e-153                  | 2e-112/2e-109                      | 2e-168/4e-171  |
| <i>Meleagris gallopavo</i>           | -/-            | XP_003205449.1/<br>XP_003203369.1 | XP_003209661.1                    | XP_003211005.1 | XP_003206855.1                 | XP_003213623.1 | -/-                            | XP_003202741.1                     | XP_003210809.1 |
|                                      |                | 0/0<br>0/0                        | 3e-116/4e-115                     | 0/0            | 2e-111/1e-118                  | 2e-123/3e-123  |                                | 8E-119/2e-117                      | 5e-169/7e-168  |
| <i>Xenopus tropicalis</i>            | NP_001007497.1 | NP_001017001.2/<br>XP_002938092.2 | NP_989110.1                       | XP_004910562.1 | XP_002933772.1                 | NP_001186425.1 | NP_001120405.1                 | NP_001011131.1                     | NP_001106444.1 |
|                                      | 4e-138/1e-137  | 0/0<br>0/0                        | 9e-130/5e-129                     | 0/0            | 2e-118/6e-117                  | 0/0            | 4e-147/1e-146                  | 2e-117/1e-116                      | 1e-149/6e-149  |
| <i>Danio rerio</i>                   | NP_998499.1    | NP_956940.1/<br>NP_976066.1       | NP_001014351.1                    | XP_005172655.1 | NP_001129721.2                 | NP_955844.1    | NP_001014351.1                 | XP_005172655.1                     | NP_001129721.2 |
|                                      | 1e-126/1e-123  | 0/0<br>0/0                        | 8e-131/4e-130                     | 0/0            | 2e-105/4e-106                  | 0/0            | 8e-131/4e-130                  | 0/0                                | 2e-105/4e-106  |
| <i>Branchiostoma floridae</i>        | XP_002594750.1 | XP_002611320.1                    | XP_002610035.1                    | XP_002599541.1 | XP_002597154.1                 | XP_002601534.1 |                                | XP_002610693.1                     | XP_002595762.1 |
|                                      | 1e-70/1e-69    | 0/0                               | 5e-108/3e-107                     | 0/0            | 1e-85/2e-87                    | 0/0            |                                | 1e-93/8e-93                        | 3e-88/3e-95    |
| <i>Strongylocentrotus purpuratus</i> | XP_785258.2    | XP_798164.3                       | XP_784617.1                       | XP_003728406.1 | XP_788012.1                    | XP_788784.3    | XP_782975.2                    | XP_792188.3/-A<br>XP_001182209.2-B | XP_799003.3    |
|                                      | 5e-98/5e-102   | 0/0                               | 4e-102/3e-101                     | 3e-146/1e-146  | 3e-87/1e-85                    | 0/0            | 1e-74/5e-81                    | 6e-87/6e-86<br>6e-72/4e-71         | 6e-82/3e-83    |
| <i>Aedes aegypti</i>                 | XP_001652185.1 | XP_001657405.1                    | XP_001653814.1                    | XP_001648501.1 | XP_001656034.1                 | XP_001658127.1 | XP_001662677.1                 | XP_001651349.1                     | -              |
|                                      | 7e-91/1e-89    | 0/0                               | 2e-92/2e-91                       | 3e-123/9e-121  | 2e-81/2e-81                    | 0/0            | 1e-40/1e-39                    | 5e-80/7e-79                        | -              |
| <i>Anopheles gambiae</i>             | XP_001688657.1 | XP_307895.3                       | XP_321189.4                       | XP_321109.5    | XP_318369.5                    | XP_315888.4    | XP_317017.4/A<br>XP_318745.2/B | XP_563593.1                        | XP_314090.4    |
|                                      | 2e-89/5e-91    | 0/0                               | 6e-94/6e-93                       | 2e-117/4e-122  | 9e-81/3e-79                    | 0/0            | 1e-37/9e-37<br>3e-13/3e-12     | 7e-81/5e-83                        | 3e-74/3e-73    |
| <i>Drosophila melanogaster</i>       | NP_648378.1    | NP_573384.1                       | NP_001259714.1/A<br>NP_723798.1/B | NP_650858.1    | NP_569903.2/A<br>NP_728606.1/B | NP_001014546.1 | NP_651715.1                    | NP_524779.1                        | NP_648353.3    |

|                               |                |                |                |                |                            |                |                |                                |                |
|-------------------------------|----------------|----------------|----------------|----------------|----------------------------|----------------|----------------|--------------------------------|----------------|
|                               | 6e-91/1e-89    | 0/0            | 3e-90/9e-41    | 7e-134/2e-137  | 6e-72/9e-70<br>1e-53/7e-52 | 1e-171/3e-169  | 1e-34/4e-31    | 2e-90/7e-90                    | 2e-77/1e-74    |
| <i>Tribolium castaneum</i>    | XP_001806886.1 | XP_975602.1    | XP_001816527.1 | XP_001814215.1 | XP_975323.1                | XP_967144.2    | XP_967118.1    |                                | XP_971827.1    |
|                               | 2e-97/4e-99    | 0/0            | 3e-98/3e-97    | 3e-161/8e-162  | 8e-85/6e-83                | 0/0            | 3e-72/2e-71    |                                | 6e-80/4e-79    |
| <i>Daphnia pulex</i>          | EFX89571.1     | EFX89563.1     | EFX65578.1     | EFX68033.1     | EFX80598.1                 | EFX84706.1     | EFX69334.1     | EFX72781.1                     | EFX79812.1     |
|                               | 1e-100/3e-99   | 0/0            | 1e-99/1e-98    | 1e-150/1e-166  | 5e-82/7e-81                | 0/0            | 8e-66/2e-63    | 2e-86/1e-85                    | 7e-79/3e-75    |
| <i>Caenorhabditis elegans</i> | NP_501392.1    | NP_497180.3    | NP_505053.1    | NP_498494.2    | NP_504411.1                | NP_505179.1    | NP_504573.1    | NP_508553.1-A<br>NP_498219.1-B | NP_001122468.1 |
|                               | 4e-91/1e-88    | 0/0            | 2e-74/1e-73    | 7e-54/4e-53    | 7e-59/4e-57                | 4e-36/1e-34    | 2e-20/1e-19    | 7e-51/4e-50<br>2e-20/1e-19     | 2e-33/3e-30    |
| <i>Nematostella vectensis</i> | XP_001628317.1 | XP_001632534.1 | XP_001641593.1 | XP_001634156.1 | XP_001640663.1             | XP_001623260.1 | XP_001624471.1 | XP_001624038.1                 | XP_001625565.1 |
|                               | 2e-100/4e-99   | 0/0            | 1e-101/1e-100  | 0.075/0.026    | 8e-81/5e-79                | 4e-49/6e-51    | 1e-70/9e-70    | 2e-90/2e-89                    | 1e-76/5e-81    |
| <i>Trichoplax adhaerens</i>   | XP_002111411.1 | XP_002112930.1 | XP_002117256.1 | XP_002108571.1 | XP_002108356.1             | XP_002116358.1 | XP_002113522.1 | XP_002111655.1                 | XP_002109233.1 |
|                               | 1e-88/4e-88    | 0/0            | 4e-84/6e-83    | 2e-117/3e-116  | 2e-78/1e-80                | 6e-142/3e-142  | 8e-54/8e-53    | 1e-78/2e-77                    | 4e-44/6e-43    |
| <i>Monosiga brevicollis</i>   | XP_001748698.1 | XP_001742554.1 | XP_001745212.1 | XP_001748603.1 | XP_001749824.1             | XP_001749781.1 | XP_001750492.1 | XP_001742594.1                 |                |
|                               | 7e-79/2e-77    | 4e-142/1e-148  | 2e-74/3e-73    | 2e-52/6e-51    | 2e-53/6e-53s               | 6e-13/1e-24    | 7e-11/8e-15    | 1e-56/2e-55                    |                |
| <b>FUNGI</b>                  |                |                |                |                |                            |                |                |                                |                |
| <i>Neurospora crassa</i>      | XP_960811.1    | XP_962452.1    | XP_960754.1    | XP_959631.1    | XP_959599.1                | XP_956120.2    | XP_959627.1    | XP_964737.1                    |                |
|                               | 2e-50/6e-50    | 6e-93/6e-96    | 2e-35/7e-35    | 0.001/5e-06    | 1e-44/5e-44                | 4e-15/7e-15    | 2e-04/7e-04    | 7E-16/3E-14                    |                |
| <i>Fusarium graminearum</i>   | XP_390475.1    | XP_382950.1    | XP_382082.1    | XP_385945.1    | XP_386552.1                | XP_380485.1    | XP_388962.1    | XP_388951.1                    |                |
|                               | 6e-48/1e-47    | 2e-93/5e-90    | 2e-38/8e-38    | 1e-04/0.027    | 6e-47/2e-46                | 4e-25/1e-26    |                | 9e-14/3e-12                    |                |

|                                  |                |                              |                |                |                |                |                |                |  |
|----------------------------------|----------------|------------------------------|----------------|----------------|----------------|----------------|----------------|----------------|--|
| <i>Aspergillus niger</i>         | XP_001392237.2 | XP_001389144.1               | XP_001388868.1 | XP_001401551.2 | XP_001397675.1 | XP_001395566.2 | XP_001401634.1 | XP_001395917.1 |  |
|                                  | 8e-54/3e-54    | 2e-106/3e-102                | 6e-40/9e-40    | 2e-08/3e-06    | 4e-48/4e-48    | 3e-21/5e-21    | 7e-12/1e-11    | 1E07/1E-06     |  |
| <i>Saccharomyces cerevisiae</i>  | NP_011877.1    | NP_010244.1                  | NP_015456.2    | NP_014566.1    | NP_015376.1    | NP_010861.3    | NP_013785.1    | NP_014896.3    |  |
|                                  | 7e-51/2e-50    | 2e-93/7e-95                  | 1e-45/5e-45    | 3e-05/2e-06    | 3e-43/3e-43    | 6e-09/3e-08    | 0.035/0.17     | 5e-07/2e-06    |  |
| <i>Kluyveromyces lactis</i>      | XP_454097.1    | XP_455464.1                  | XP_452031.1    | XP_454752.1    | XP_452068.1    | XP_451085.1    | XP_454790.1    | XP_452637.1    |  |
|                                  | 3e-111/3e-110  | 0/0                          | 7e-96/9e-98    | 5e-130/1e-124  | 1e-86/1e-85    | 8e-175/7e-174  | 4e-06/2e-05    | 1e-35/7e-35    |  |
| <i>Candida albicans</i>          | XP_719378.1    | XP_714733.1                  | XP_718835.1    | XP_719033.1    | XP_722835.1    | XP_721703.1    | XP_722734.1    | XP_717442.1    |  |
|                                  | 4e-87/1e-86    | 0/0                          | 7e-62/2e-61    | 4e-20/3e-18    | 2e-57/7e-57    | 4e-34/2e-39    | 8e-20/1e-17    | 4e-17/1e-16    |  |
| <i>Schizosaccharomyces pombe</i> | NP_594309.1    | NP_588160.1<br>NP_596495.1   | NP_587922.1    | NP_595632.1    | NP_596246.1    | NP_596720.1    | NP_588054.1    | NP_588274.1    |  |
|                                  | 9e-56/5e-55    | 2e-104/2e-104<br>1E-36/7E-37 | 3e-55/2e-52    | 6e-07/2e-08    | 7e-50/5e-49    | 3e-11/3e-11    | 9e-12/5e-11    | 7e-11/5e-10    |  |
| <i>Pneumocystis murina</i>       | EMR09126.1     | EMR08274.1                   | EMR08470.1     | EMR10944.1     | EMR08451.1     | EMR09747.1     | EMR08653.1     | EMR11455.1     |  |
|                                  | 3e-50/3e-49    | 7e-98/2e-96                  | 2e-48/3e-47    | 4e-14/2e-14    | 2e-33/1e-32    | 6e-28/7e-27    | 1e-08/1e-07    | 6e-43/2e-41    |  |
| <i>Coprinopsis cinerea</i>       | XP_001837459.1 | XP_002910266.1               | XP_001832867.2 | XP_001833237.2 | XP_001834267.2 | XP_001839874.1 | XP_001828773.2 | XP_001830348.1 |  |
|                                  | 2e-56/5e-56    | 8e-77/1e-76                  | 1e-34/3e-34    | 2e-67/2e-66    | 9e-43/3e-43    | 1e-07/2e-08    | 6e-18/5e-17    | 1e-10/3e-10    |  |
| <i>Cryptococcus gattii</i>       | XP_003194497.1 | XP_003194436.1               | XP_003195355.1 | XP_003193706.1 | XP_003193896.1 | XP_003194296.1 | XP_003193757.1 | XP_003195679.1 |  |
|                                  | 4e-55/2e-54    | 5e-75/5e-75                  | 1e-33/9e-31    | 0.065/1e-04    | 6e-27/5e-26    | 6e-16/1e-14    | 7e-15/1e-13    | 1e-06/8e-06    |  |
| <i>Ustilago maydis</i>           | XP_757531.1    | XP_756726.1                  | XP_760424.1    | XP_762208.1    | XP_757770.1    | XP_756983.1    | XP_756426.1    | XP_757178.1    |  |
|                                  | 1e-35/4e-35    | 1e-85/6e-84                  | 3e-42/2e-41    | 6e-08/2e-05    | 3e-45/1e-44    | 1e-04/8e-04    | 3e-23/2e-22    | 2e-51/8e-49    |  |



|                                       |                |             |                |             |             |                              |             |                                 |   |
|---------------------------------------|----------------|-------------|----------------|-------------|-------------|------------------------------|-------------|---------------------------------|---|
| <i>Rhizopus delemar</i>               | EIE76483.1     | EIE91923.1  | EIE79187.1     | EIE90995.1  |             | EIE87740.1-A<br>EIE87861.1-B | EIE87147.1  | EIE92156.1-AY<br>EIE89248.1-BH  |   |
|                                       | 1e-52/4e-52    | 2e-97/9e-97 | 3e-35/8e-35    | 3e-73/4e-72 |             | 4e-19/3e-18<br>2e-17/1e-16   | 4e-05/1e-07 | 7e-06/2e-05/<br>5E-51/7E-50     |   |
| <i>Batrachochytrium dendrobatidis</i> | EGF78314.1     | EGF82906.1  | EGF83148.1     | EGF81799.1  | EGF83881.1  | EGF78302.1                   |             | EGF78648.1- AH<br>EGF78926.1-BH |   |
|                                       | 3e-56/9e-56    | 4e-78/1e-76 | 2e-37/1e-36    | 9e-83/2e-81 | 4e-45/2e-44 | 1e-41/4e-37                  |             | 1e-31/6e-34<br>1e-10/3e-09      |   |
| <b>MICROSPORIDIA</b>                  |                |             |                |             |             |                              |             |                                 |   |
| <i>Vittaforma corneae</i>             | ELA41368.1     | -           | ELA41574.1     | -           | -           | -                            | -           | ELA41057.1                      | - |
|                                       | 7e-06/1e-04    |             | 7e-24/2e-22    |             |             |                              |             | 2e-21/2e-19                     |   |
| <i>Enterocytozoon bieneusi</i>        | XP_002649714.1 | -           | XP_002649725.1 | -           | -           | -                            | -           | -                               | - |
|                                       | 1e-08/3e-06    |             | 3e-06/6e-05    |             |             |                              |             |                                 |   |
| <i>Encephalitozoon cuniculi</i>       | NP_585802.1    | -           | NP_586095.1    | -           | -           | -                            | -           | NP_585856.1                     | - |
|                                       | 2e-08/3e-12    |             | 4e-27/5e-26    |             |             |                              |             | 6e-04/5e-19                     |   |
| <i>Encephalitozoon intestinalis</i>   | XP_003073006.1 | -           | XP_003073284.1 | -           | -           | -                            | -           | XP_003073060.1                  | - |
|                                       | 2e-08/4e-07    |             | 3e-26/9e-25    |             |             |                              |             | 9e-75/2e-74                     |   |
| <i>Encephalitozoon hellem</i>         | XP_003887395.1 | -           | XP_003887669.1 | -           | -           | -                            | -           | -                               | - |
|                                       | 1e-08/3e-07    |             | 3e-28/8e-27    |             |             |                              |             |                                 |   |
| <i>Nosema ceranae</i>                 | XP_002995490.1 | -           | XP_002994996.1 | -           | -           | -                            | -           | XP_002996047.1                  | - |
|                                       | 2e-08/8e-12    |             | 7e-21/2e-24    |             |             |                              |             | 1e-24/2e-22                     |   |
| <i>Nosema bombycis</i>                | -              | -           | EOB13495.1     | -           | -           | -                            | -           | EOB12821.1                      | - |
|                                       |                |             | 4e-25/5e-32    |             |             |                              |             | 1e-04/5e-05                     |   |

|                                   |             |   |             |    |   |   |   |             |   |
|-----------------------------------|-------------|---|-------------|----|---|---|---|-------------|---|
| <i>Vavraia culicis</i>            | ELA46817.1  | - | ELA47084.1  | 4- | - | - | - | ELA47635.1  | - |
|                                   | 6e-10/1e-08 |   | 2e-23/2e-26 |    |   |   |   | 7e-21/6e-19 |   |
| <i>Trachipleistophora hominis</i> | ELQ76313.1  | - | ELQ74754.1  | -  | - | - | - | ELQ76577.1  | - |
|                                   | 6e-30/2e-30 |   | 2e-23/2e-26 |    |   |   |   | 1e-13/6e-12 |   |
| <i>Nosema parisii</i>             | EIJ88594.1  | - | EIJ89578.1  | -  | - | - | - | EIJ87901.1  | - |
|                                   | 3e-20/1e-21 |   | 4e-12/1e-14 |    |   |   |   | 7e-19/5e-17 |   |

## AMOEBOZOA

|                                 |                             |                             |             |             |             |             |                |                |             |
|---------------------------------|-----------------------------|-----------------------------|-------------|-------------|-------------|-------------|----------------|----------------|-------------|
| <i>Dictyostelium discoideum</i> | XP_643534.2                 | XP_643789.1                 | XP_643184.2 | XP_629232.1 | XP_638028.1 | XP_646863.1 |                | XP_002649166.1 | XP_636154.1 |
|                                 | 2e-58/2e-58                 | 2e-109/9e-106               | 8e-78/8e-77 | 5e-67/7e-67 | 2e-50/2e-50 | 9e-13/5e-16 |                | 5e-48/5e-50    | 1e-07/2e-04 |
| <i>Entamoeba histolytica</i>    | XP_652840.1/<br>XP_649513.1 | XP_648732.1/<br>XP_650321.2 | XP_654064.2 | XP_649927.1 | XP_650166.1 | XP_655063.1 | XP_001914091.1 | XP_651314.1    | XP_649081.1 |
|                                 | 8e-56/2e-53<br>3e-43/3e-44  | 6e-40/1e-41<br>5e-33/4e-34  | 3e-64/8e-61 | 0.004/0.046 | 4e-41/1e-38 | 7e-14/8e-11 | 2e-12/2e-14    | 2e-09/3e-08    | 3e-10/3e-09 |

## PLANTS

|                             |                |                |                |                |                |                |                                                          |                |                |
|-----------------------------|----------------|----------------|----------------|----------------|----------------|----------------|----------------------------------------------------------|----------------|----------------|
| <i>Chlorella variabilis</i> | XP_005850279.1 | XP_005847916.1 | XP_005846769.1 | XP_005848802.1 | XP_005846533.1 | XP_005845397.1 | XP_005846799.1                                           | XP_005850764.1 | XP_005851588.1 |
|                             | 8e-08/1e-77    | 2e-166/7e-172  | 2e-72/4e-71    | 5e-16/2e-24    | 1e-54/1e-53    | 2e-07/4e-13    | 3e-41/1e-40                                              | 2e-46/4e-45    | 3e-13/5e-12    |
| <i>Volvox carteri</i>       | XP_002949928.1 | XP_002946235.1 | XP_002950281.1 | XP_002959409.1 | XP_002952437.1 | XP_002951162.1 | XP_002950156.1                                           | XP_002950586.1 | XP_002949307.1 |
|                             | 3e-68/5e-69    | 2e-173/4e-180  | 6e-80/6e-79    | 0.29/5e-10     | 5e-60/7e-60    | 1e-07/1e-18    | 5e-22/1e-20                                              | 2e-42/2e-41    | 2e-08/1e-07    |
| <i>Minuartia pusilla</i>    | XP_003062110.1 | XP_003062812.1 | XP_003057625.1 | XP_003058109.1 | XP_003063612.1 | XP_003055409.1 | XP_003058022.1-A<br>XP_003057542.1-B<br>XP_003054998.1-C | XP_003058818.1 | XP_003057553.1 |
|                             | 7e-65/2e-63    | 2e-141/1e-152  | 1e-70/3e-69    | 4e-46/6e-47    | 2e-46/1e-45    | 6e-17/2e-16    | 2e-26/3e-25<br>3e-24/2e-25<br>5E-12/2E-10                | 2e-30/2e-29    | 2e-07/4e-06    |

|                                 |                                    |                                                      |                                      |                |                                      |                |                                                          |                                      |                                      |
|---------------------------------|------------------------------------|------------------------------------------------------|--------------------------------------|----------------|--------------------------------------|----------------|----------------------------------------------------------|--------------------------------------|--------------------------------------|
| <i>Ostreococcus lucimarinus</i> | XP_001418332.1                     | XP_001415662.1                                       | XP_001417209.1                       | XP_001420128.1 | XP_001422608.1                       | XP_001420852.1 | XP_001417476.1                                           | XP_001421022.1                       | XP_001416376.1                       |
|                                 | 6e-56/3e-57                        | 5e-123/3e-124                                        | 1e-65/4e-64                          | 1e-24/1e-31    | 3e-49/2e-48                          | 5e-34/6e-39    | 9e-28/2e-26                                              | 2e-36/5e-35                          | 5e-83/5e-83                          |
| <i>Ostreococcus tauri</i>       | XP_003080092.1                     | XP_003074639.1                                       | XP_003078698.1                       | XP_003081593.1 | XP_003083105.1                       | XP_003082419.1 | XP_003078705.1                                           | XP_003081403.1-A<br>XP_003082790.1-B | XP_003074795.1                       |
|                                 | 7e-51/1e-49                        | 2e-110/9e-115                                        | 2e-62/6e-61                          | 5e-17/4e-18    | 6e-51/1e-49                          | 4e-21/1e-25    | 1e-27/2e-26                                              | 1e-44/2e-43<br>3e-10/1e-08           | 5e-06/6e-05                          |
| <i>Physcomitrella patens</i>    | XP_001781748.1/<br>XP_001755278.1  | XP_001783197.1/<br>XP_001764313.1/<br>XP_001776114.1 | XP_001781047.1                       | XP_001784815.1 | XP_001782364.1                       | XP_001777179.1 | XP_001757751.1-A<br>XP_001767987.1-B<br>XP_001768065.1-C | XP_001762002.1                       | XP_001766566.1-A<br>XP_001755869.1-B |
|                                 | 1e-73/1e-74<br>5e-42/5e-42         | 0/0<br>0/0<br>0/0                                    | 3e-72/2e-71                          | 1e-44/4e-44    | 6e-56/2e-55                          | 3e-64/4e-68    | 3e-32/1e-34<br>1e-36/1e-35<br>9E-29/4E-29                | 1e-58/9e-58                          | 3e-25/7e-22<br>3e-21/7e-18           |
| <i>Oryza sativa</i>             | NP_001054011.1                     | NP_001043582.1                                       | NP_001050988.1                       | NP_001055256.1 | NP_001067995.1                       | BAD36037.1     | NP_001055426.1-A<br>NP_001048264.1-B                     | NP_001043544.2                       | NP_001173121.1                       |
|                                 | 2e-71/2e-70                        | 0/0                                                  | 8e-72/1e-71                          | 6e-49/1e-48    | 7e-52/2e-51                          | 1e-60/3e-61    | 4e-27/4e-27<br>9e-23/1e-25                               | 1e-09/2e-06                          | 1e-10/2e-16                          |
| <i>Zea mays</i>                 | NP_001141256.1/<br>NP_001140477.1/ | NP_001142479.1                                       | NP_001105069.1                       | XP_008650616.1 | NP_001150590.1                       | XP_008679211.1 | NP_001149697.1                                           | NP_001148868.1                       | NP_001131664.1                       |
|                                 | 4e-133/9e-136<br>1e-72/5e-73       | 0/0                                                  | 6e-73/2e-72                          | 9e-22/2e-26    | 4e-53/2e-53                          | 4e-17/4e-14    | 4e-24/2e-20                                              | 5e-50/2e-49                          | 3e-20/1e-19                          |
| <i>Vitis vinifera</i>           | XP_002273592.1                     | XP_002284882.1                                       | XP_002278246.1                       | XP_002273069.1 | XP_002276364.1                       | XP_002282486.2 | XP_002263749.2                                           | XP_002284766.1                       | XP_002273780.1                       |
|                                 | 4e-70/2e-69                        | 0/0                                                  | 8e-72/2e-71                          | 1e-49/3e-52    | 3e-55/2e-54                          | 1e-22/2e-22    | 1e-29/6e-29                                              | 2e-57/4e-54                          | 1e-22/9e-26                          |
| <i>Arabidopsis thaliana</i>     | NP_196882.1                        | NP_178157.2                                          | NP_563677.1                          | NP_200653.2    | NP_181348.1                          | NP_178872.2    | NP_683313.2                                              | NP_196695.1                          | NP_974793.1/<br>NP_186948.1          |
|                                 | 2e-69/8e-69                        | 0/0                                                  | 7e-73/2e-72                          | 4e-45/8e-51    | 3e-54/8e-54                          | 1e-61/2e-57    | 5e-31/2e-33                                              | 3e-53/1e-52                          | 9e-18/3e-17<br>2e-14/6e-14           |
| <i>Populus trichocarpa</i>      | XP_002314058.1/<br>XP_002298415.1  | XP_002299630.1/<br>XP_002304180.1                    | XP_002307586.1-A<br>XP_002300841.1-B | XP_002319956.1 | XP_002317002.1-A<br>XP_002298931.1-B | XP_002308056.1 | XP_002318313.1                                           | XP_002324274.1-A<br>XP_002308640.1-B | XP_002319255.1-A<br>XP_002325388.1-B |
|                                 | 1e-70/4e-69<br>2e-69/3e-68         | 7e-167/2e-167<br>8e-81/1e-85                         | 9e-72/5e-71<br>4e-56/2e-53           | 6e-43/4e-42    | 6e-55/7e-54<br>5e-54/5e-53           | 5e-64/1e-64    | 5e-32/2e-34                                              | 3e-53/2e-52<br>2e-52/1e-51           | 3e-20/2e-19<br>1e-19/6e-19           |
| <i>Ricinus communis</i>         | XP_002517754.1                     | XP_002517521.1                                       | XP_002520731.1                       | XP_002516347.1 | XP_002512831.1                       | XP_002531946.1 | XP_002533736.1                                           | XP_002514360.1                       | XP_002520055.1                       |
|                                 | 1e-71/6e-70                        | 0/0                                                  | 1e-73/1e-72                          | 1e-45/1e-47    | 7e-55/1e-53                          | 3e-64/1e-60    | 1e-35/1e-34                                              | 7e-59/2e-55                          | 4e-21/3e-20                          |

| EXCAVATS                     |                                                                         |                                                      |                |                |                |                |                                                                                                  |                                                                                                  |                                      |
|------------------------------|-------------------------------------------------------------------------|------------------------------------------------------|----------------|----------------|----------------|----------------|--------------------------------------------------------------------------------------------------|--------------------------------------------------------------------------------------------------|--------------------------------------|
| <i>Trypanosoma cruzi</i>     | XP_817467.1                                                             | XP_807954.1                                          | XP_808666.1    | XP_810210.1    | XP_804793.1    | EKF28593.1     | XP_813517.1                                                                                      | XP_812778.1                                                                                      |                                      |
|                              | 3e-58/2e-57                                                             | 1e-73/7e-81                                          | 5e-53/2e-52    | 1e-17/2e-18    | 2e-30/1e-32    | 8e-07/7e-06    | 0.024/0.010                                                                                      | 1e-25/5e-25                                                                                      |                                      |
| <i>Leishmania donovani</i>   | XP_003859238.1                                                          | XP_003865255.1                                       | XP_003861333.1 | XP_003862768.1 | XP_003860783.1 | XP_003859962.1 | XP_003861138.1                                                                                   | XP_003857978.1                                                                                   |                                      |
|                              | 4e-54/2e-55                                                             | 1e-72/5e-77                                          | 3e-55/2e-53    | 6e-21/9e-20    | 3e-36/1e-34    | 6e-06/6e-06    | 0.17/1,2                                                                                         | 9e-23/2e-21                                                                                      |                                      |
| <i>Leishmania major</i>      | XP_001681770.1                                                          | XP_001686706.1                                       | XP_001683754.1 | XP_001684642.1 | XP_001683197.1 | XP_001682355.1 | XP_001681528.1                                                                                   | XP_003721691.1                                                                                   | XP_001682540.1                       |
|                              | 3e-54/1e-54                                                             | 4e-69/7e-76                                          | 4e-52/1e-53    | 6e-22/8e-21    | 2e-35/9e-34    | 8e-04/1e-05    | 0.42/0.10                                                                                        | 4e-22/8e-21                                                                                      | 0.002/0.21                           |
| <i>Naegleria gruberi</i>     | XP_002678584.1                                                          | XP_002679243.1                                       | XP_002683334.1 | XP_002680435.1 | XP_002674973.1 | XP_002680625.1 | XP_002679876.1                                                                                   | XP_002677269.1                                                                                   | XP_002673458.1                       |
|                              | 1e-65/6e-67                                                             | 5e-106/7e-109                                        | 5e-76/6e-75    | 4e-42/4e-41    | 4e-05/8e-05    | 3e-39/1e-37    | 0.045/0.051                                                                                      | 7e-33/8e-32                                                                                      | 1e-09/2e-08                          |
| <i>Giardia lamblia</i>       | XP_001708371.1                                                          | XP_001704054.1                                       | XP_001705505.1 |                | XP_001708463.1 |                | EFD95470.1                                                                                       |                                                                                                  |                                      |
|                              | 7e-38/8e-37                                                             | 6E-04/8E-04                                          | 7e-31/6e-30    |                | 2e-25/7e-25    |                | 3E-04/5E-04                                                                                      |                                                                                                  |                                      |
| <i>Trichomonas vaginalis</i> | XP_001320341.1/<br>XP_001321406.1/<br>XP_001319170.1/<br>XP_001328034.1 | XP_001318906.1/<br>XP_001581881.1/<br>XP_001317430.1 | XP_001582947.1 | XP_001319977.1 | XP_001320347.1 | XP_001330429.1 | XP_001579481.1-A<br>XP_001310507.1-B<br>XP_001304312.1-C<br>XP_001314637.1-D<br>XP_001330572.1-E | XP_001321375.1-A<br>XP_001330697.1-B<br>XP_001584123.1-C<br>XP_001329893.1-D<br>XP_001307166.1-E | XP_001300699.1                       |
|                              | 8e-37/3e-36<br>1e-35/1e-35<br>6e-35/2e-37<br>1e-33/8e-33                | 1e-23/3e-28<br>2e-21/1e-25<br>8e-18/2e-17            | 7e-51/3e-50    | 0.091/0.21     | 2e-37/1e-37    | 0.021/0.090    | 4e-38/5e-40<br>1e-29/5e-29<br>1e-27/7e-27<br>7e-19/1e-19<br>3e-11/9e-11                          | 4e-24/2e-23<br>5e-24/2e-23<br>1e-09/5e-09<br>7e-09/3e-08<br>8e-09/4e-08                          | 6e-08/2e-07                          |
| CHROMALVEOLATA               |                                                                         |                                                      |                |                |                |                |                                                                                                  |                                                                                                  |                                      |
| <i>Perkinsus marinus</i>     | XP_002785590.1                                                          | XP_002773906.1                                       | XP_002767399.1 | XP_002767529.1 | XP_002785517.1 | XP_002774903.1 | XP_002767502.1                                                                                   | XP_002778867.1                                                                                   | XP_002776798.1-A<br>XP_002765203.1-B |
|                              | 4e-64/6e-63                                                             | 1e-57/9e-62                                          | 9e-53/9e-55    | 9e-15/8e-14    | 2e-43/4e-42    | 6e-20/7e-20    | 1e-24/1e-23                                                                                      | 4e-26/8e-25                                                                                      | 5e-17/9e-18<br>7E-04/0.007           |

|                                  |                |                                   |                |                |                                      |                |                |                                                                              |                |
|----------------------------------|----------------|-----------------------------------|----------------|----------------|--------------------------------------|----------------|----------------|------------------------------------------------------------------------------|----------------|
| <i>Toxoplasma gondii</i>         | XP_002370728.1 | XP_002366057.1                    | XP_002368415.1 | XP_002367657.1 | XP_002365121.1                       |                | XP_002367927.1 | XP_002365184.1                                                               | XP_002365228.1 |
|                                  | 4e-54/5e-53    | 3e-61/1e-58                       | 2e-58/8e-58    | 9e-06/5e-05    | 9e-11/3e-10                          |                | 4e-17/3e-16    | 2e-32/1e-32                                                                  | 2e-11/1e-07    |
| <i>Plasmodium falciparum</i>     | XP_001347321.1 | XP_001350828.1                    | XP_001351025.1 |                | XP_002808814.1                       |                | XP_001349973.1 |                                                                              | XP_001349433.2 |
|                                  | 1e-35/8e-44    | 7e-25/2e-23                       | 9e-38/5e-40    |                | 1e-19/6e-19                          |                | 4e-11/4e-10    |                                                                              | 6e-06/1e-05    |
| <i>Paramecium tetraurelia</i>    | XP_001457344.1 | XP_001433619.1/<br>XP_001436823.1 | XP_001444692.1 | XP_001446304.1 | XP_001431642.1-A<br>XP_001447095.1-B | XP_001425968.1 |                | XP_001455694.1-A<br>XP_001425966.1-B<br>XP_001442627.1-C<br>XP_001454240.1-D | XP_001462395.1 |
|                                  | 7e-57/4e-54    | 1e-87/4e-86<br>1e-78/2e-73        | 3e-59/1e-58    | 6e-08/2e-07    | 3e-44/4e-44<br>6e-44/1e-43           | 4e-17/6e-15    |                | 1e-38/6e-38<br>3e-38/7e-38<br>2e-15/4e-15<br>3e-13/3e-12                     | 4E-07/1E-07    |
| <i>Phaeodactylum tricornutum</i> | XP_002176567.1 | XP_002181258.1                    | XP_002181755.1 | XP_002182373.1 | XP_002176589.1                       | XP_002184196.1 | XP_002178919.1 | XP_002179446.1                                                               | XP_002186492.1 |
|                                  | 3e-67/6e-66    | 1e-133/3e-134                     | 4e-71/7e-70    | 3e-23/2e-21    | 9e-44/5e-43                          | 8e-20/5e-15    | 7e-24/1e-22    | 1e-34/2e-33                                                                  | 5e-23/5e-25    |

Supplementary Table 2

**Position 2**

|          | <b>NATs</b>             | D. discoideum-revie | D. discoideur | E. histolytica | P. tetraurelia | P. marinus-ur | P. tricornutur | P. falciparum |
|----------|-------------------------|---------------------|---------------|----------------|----------------|---------------|----------------|---------------|
| iMet-Cys | <b>A</b>                | 0.1388              | 0.5196        | 0.2079         | 0.2843         | 0.7166        | 0.497          | 0.6803        |
| iMet-Ala | <b>A,(E),(F)</b>        | 1.6012              | 1.5231        | 1.3265         | 0.958          | 1.4643        | 1.1633         | 1.8771        |
| iMet-Gly | <b>A,(F)</b>            | 0.9705              | 0.9586        | 0.8436         | 1.5492         | 0.7811        | 0.6153         | 1.274         |
| iMet-Ser | <b>A,(E),(F)</b>        | 1.7986              | 1.4454        | 3.0223         | 1.7972         | 2.3545        | 1.6924         | 1.4403        |
| iMet-Thr | <b>A,(E),(F)</b>        | 1.6282              | 1.001         | 1.4428         | 0.5239         | 1.3287        | 1.3939         | 0.7583        |
| iMet-Val | <b>A,( C ), (E),(F)</b> | 0.8828              | 0.9932        | 0.4485         | 0.3257         | 1.0331        | 0.7507         | 1.0334        |
| iMet-Asp | <b>B</b>                | 1.2453              | 1.5839        | 0.7651         | 1.2093         | 0.7055        | 0.6759         | 0.9493        |
| iMet-Glu | <b>B</b>                | 1.4922              | 1.4325        | 1.2929         | 0.6801         | 0.4757        | 0.7438         | 1.1314        |
| iMet-Asn | <b>B</b>                | 0.9637              | 1.1328        | 1.5318         | 1.9128         | 0.7585        | 1.3413         | 0.9295        |
| iMet-Gln | <b>B,( F)</b>           | 0.3687              | 0.4081        | 1.1241         | 1.1627         | 0.6863        | 0.7633         | 0.5913        |
| iMet-His | <b>C</b>                | 0.1446              | 0.396         | 0.3412         | 0.747          | 0.6107        | 0.5578         | 0.5738        |
| iMet-Met | <b>C,E,F</b>            | 0.8392              | 0.6855        | 0.3303         | 0.4375         | 0.5319        | 0.8527         | 1.0954        |
| iMet-Tyr | <b>C,E,F</b>            | 0.4389              | 0.6548        | 0.2932         | 0.6362         | 0.5238        | 0.4946         | 0.7243        |
| iMet-Lys | <b>C,E</b>              | 1.2706              | 1.5673        | 1.0848         | 1.2544         | 0.6725        | 2.7452         | 1.242         |
| iMet-Phe | <b>C,E</b>              | 0.7854              | 0.7329        | 0.7997         | 0.8882         | 1.0629        | 0.5256         | 1.0088        |
| iMet-Ile | <b>C,F</b>              | 0.8677              | 0.8831        | 0.5228         | 0.9392         | 0.6023        | 0.8546         | 0.7928        |
| iMet-Leu | <b>C,F</b>              | 0.4555              | 0.502         | 0.501          | 0.715          | 0.8556        | 0.5587         | 0.7745        |
| iMet-Arg |                         | 0.7109              | 0.6114        | 0.5877         | 0.8118         | 0.7579        | 1.0878         | 1.3426        |
| iMet-Pro |                         | 0.3913              | 0.3713        | 0.5413         | 0.457          | 1.5674        | 1.1324         | 0.732         |
| iMet-Trp |                         | 0.2778              | 0.3432        | 0.3003         | 0.3315         | 0.5619        | 0.5799         | 1.0745        |

**Position 3**

|            | <b>NATs</b>      | D. discoideum-revie | D. discoideur | E. histolytica | P. tetraurelia | P. marinus-ur | P. tricornutur | P. falciparum |
|------------|------------------|---------------------|---------------|----------------|----------------|---------------|----------------|---------------|
| iMet-X-Cys | <b>A</b>         | 0.4336              | 0.6276        | 0.8102         | 0.8803         | 0.934         | 0.6272         | 0.8505        |
| iMet-X-Ala | <b>A,(E),(F)</b> | 0.6288              | 0.6436        | 1.0275         | 0.7304         | 1.0013        | 0.7885         | 0.6851        |
| iMet-X-Gly | <b>A,(F)</b>     | 0.6084              | 0.6837        | 0.8335         | 0.5832         | 0.8593        | 0.5697         | 0.9141        |

|            |                         |        |        |        |        |        |        |        |
|------------|-------------------------|--------|--------|--------|--------|--------|--------|--------|
| iMet-X-Ser | <b>A,(E),(F)</b>        | 1.2508 | 1.1243 | 1.1801 | 1.3836 | 1.7575 | 1.2951 | 1.0705 |
| iMet-X-Thr | <b>A,(E),(F)</b>        | 1.2453 | 1.1394 | 1.2433 | 1.0778 | 1.3312 | 1.335  | 1.0774 |
| iMet-X-Val | <b>A,( C ), (E),(F)</b> | 0.6991 | 0.766  | 0.9041 | 0.6255 | 0.8846 | 0.7141 | 1.2527 |
| iMet-X-Asp | <b>B</b>                | 0.9259 | 0.9457 | 1.0282 | 0.8263 | 0.9243 | 0.8196 | 0.9111 |
| iMet-X-Glu | <b>B</b>                | 1.2111 | 1.0291 | 1.2178 | 0.8085 | 0.7756 | 0.7557 | 1.0428 |
| iMet-X-Asn | <b>B</b>                | 0.9973 | 1.0932 | 1.0679 | 1.4866 | 1.3329 | 1.3805 | 0.8533 |
| iMet-X-Gln | <b>B,( F )</b>          | 0.6908 | 0.7736 | 1.1338 | 1.4645 | 0.7604 | 0.9954 | 0.6694 |
| iMet-X-His | <b>C</b>                | 0.9199 | 0.8218 | 0.9184 | 0.9498 | 0.9488 | 0.9386 | 0.8166 |
| iMet-X-Met | <b>C,E,F</b>            | 0.4402 | 0.6061 | 0.4883 | 0.4626 | 0.5953 | 0.6595 | 0.7696 |
| iMet-X-Tyr | <b>C,E,F</b>            | 0.7388 | 0.8635 | 0.6742 | 0.9156 | 0.8706 | 0.9474 | 0.7974 |
| iMet-X-Lys | <b>C,E</b>              | 1.4568 | 1.5046 | 1.0878 | 1.192  | 0.7927 | 1.7871 | 1.1722 |
| iMet-X-Phe | <b>C,E</b>              | 1.082  | 1.0773 | 1.0154 | 0.8969 | 1.1135 | 1.1678 | 1.1473 |
| iMet-X-Ile | <b>C,F</b>              | 1.3137 | 1.0953 | 0.8901 | 0.8846 | 1.1328 | 1.0231 | 1.0852 |
| iMet-X-Leu | <b>C,F</b>              | 0.88   | 0.8973 | 0.8394 | 0.7163 | 0.7919 | 0.8788 | 0.9828 |
| iMet-X-Arg |                         | 1.4457 | 1.4414 | 1.4859 | 1.1904 | 0.9476 | 1.3418 | 1.7465 |
| iMet-X-Pro |                         | 0.5781 | 0.6447 | 0.6438 | 0.9236 | 1.0355 | 1.0063 | 0.8866 |
| iMet-X-Trp |                         | 0.5247 | 0.5249 | 0.8521 | 0.4693 | 0.5954 | 0.7564 | 0.5931 |

## Position 4

|              | <b>NATs</b>             | D. discoideum-revie | D. discoideur | E. histolytica | P. tetraurelia | P. marinus-ur | P. tricornutur | P. falciparum |
|--------------|-------------------------|---------------------|---------------|----------------|----------------|---------------|----------------|---------------|
| iMet-X-X-Cys | <b>A</b>                | 0.3642              | 0.5871        | 0.5318         | 1.313          | 0.8486        | 0.7961         | 0.9771        |
| iMet-X-X-Ala | <b>A,(E),(F)</b>        | 0.6742              | 0.6467        | 0.7476         | 0.8138         | 0.9599        | 0.8427         | 0.7785        |
| iMet-X-X-Gly | <b>A,(F)</b>            | 0.5456              | 0.5429        | 0.6206         | 0.6563         | 0.7721        | 0.5332         | 0.9352        |
| iMet-X-X-Ser | <b>A,(E),(F)</b>        | 0.8756              | 0.8504        | 1.1183         | 1.1618         | 1.526         | 1.4179         | 1.0506        |
| iMet-X-X-Thr | <b>A,(E),(F)</b>        | 0.9471              | 0.9301        | 1.4133         | 0.9564         | 1.2656        | 1.284          | 1.0094        |
| iMet-X-X-Val | <b>A,( C ), (E),(F)</b> | 0.8012              | 0.8785        | 0.9821         | 0.8213         | 0.8214        | 0.7913         | 1.227         |
| iMet-X-X-Asp | <b>B</b>                | 0.7824              | 0.7226        | 0.7509         | 0.7661         | 0.7834        | 0.6237         | 0.5894        |
| iMet-X-X-Glu | <b>B</b>                | 0.8805              | 0.8311        | 1.0298         | 0.8699         | 0.7348        | 0.6765         | 0.7852        |
| iMet-X-X-Asn | <b>B</b>                | 1.1147              | 1.2312        | 0.9011         | 1.1662         | 1.0939        | 1.1098         | 0.6719        |

|              |               |        |        |        |        |        |        |        |
|--------------|---------------|--------|--------|--------|--------|--------|--------|--------|
| iMet-X-X-Gln | <b>B,( F)</b> | 0.7748 | 0.8017 | 1.3125 | 1.1991 | 0.9938 | 1.0036 | 0.9817 |
| iMet-X-X-His | <b>C</b>      | 0.9593 | 0.7866 | 0.8798 | 1.0755 | 0.9488 | 0.9533 | 1.3973 |
| iMet-X-X-Met | <b>C,E,F</b>  | 0.6328 | 0.5109 | 0.4575 | 0.4292 | 0.5692 | 0.5859 | 0.7228 |
| iMet-X-X-Tyr | <b>C,E,F</b>  | 0.9362 | 0.9659 | 0.6714 | 0.9542 | 0.8356 | 0.8592 | 1.1062 |
| iMet-X-X-Lys | <b>C,E</b>    | 1.4045 | 1.3348 | 0.8995 | 1.0411 | 0.9837 | 1.2413 | 1.0373 |
| iMet-X-X-Phe | <b>C,E</b>    | 1.5269 | 1.2299 | 1.2282 | 1.1025 | 1.1859 | 1.1256 | 1.4517 |
| iMet-X-X-Ile | <b>C,F</b>    | 1.3805 | 1.3541 | 1.0679 | 1.0631 | 1.0984 | 1.313  | 1.1746 |
| iMet-X-X-Leu | <b>C,F</b>    | 1.2118 | 1.306  | 1.1291 | 0.988  | 0.9907 | 1.1358 | 1.2969 |
| iMet-X-X-Arg |               | 1.1103 | 1.0025 | 1.1853 | 1.1519 | 1.0542 | 1.2371 | 1.3813 |
| iMet-X-X-Pro |               | 0.9227 | 0.8177 | 1.2515 | 1.0021 | 1.3321 | 1.1649 | 1.0034 |
| iMet-X-X-Trp |               | 0.2778 | 0.498  | 1.0408 | 0.6368 | 0.6029 | 0.827  | 0.9792 |

## Position 5

|                | <b>NATs</b>             | D. discoideum-revie | D. discoideur | E. histolytica | P. tetraurelia | P. marinus-ur | P. tricornutur | P. falciparum |
|----------------|-------------------------|---------------------|---------------|----------------|----------------|---------------|----------------|---------------|
| iMet-X-X-X-Cys | <b>A</b>                | 0.555               | 0.6175        | 0.6654         | 1.2718         | 0.9573        | 0.9987         | 0.9185        |
| iMet-X-X-X-Ala | <b>A,(E),(F)</b>        | 0.7974              | 0.6936        | 0.6703         | 0.8023         | 1.0018        | 0.8354         | 0.6495        |
| iMet-X-X-X-Gly | <b>A,(F)</b>            | 0.5939              | 0.5826        | 0.7205         | 0.6282         | 0.8641        | 0.6305         | 0.9637        |
| iMet-X-X-X-Ser | <b>A,(E),(F)</b>        | 0.9931              | 0.8581        | 1.027          | 1.1473         | 1.4304        | 1.2625         | 1.0784        |
| iMet-X-X-X-Thr | <b>A,(E),(F)</b>        | 0.8786              | 0.9259        | 1.2253         | 1.0542         | 1.2962        | 1.2433         | 0.8461        |
| iMet-X-X-X-Val | <b>A,( C ), (E),(F)</b> | 0.842               | 0.8317        | 1.0043         | 0.8657         | 0.9645        | 0.7923         | 1.1062        |
| iMet-X-X-X-Asp | <b>B</b>                | 0.8194              | 0.8445        | 0.8681         | 0.8304         | 0.8104        | 0.7257         | 0.6093        |
| iMet-X-X-X-Glu | <b>B</b>                | 1.0871              | 0.9289        | 0.9666         | 0.8723         | 0.8034        | 0.7318         | 0.7695        |
| iMet-X-X-X-Asn | <b>B</b>                | 1.1387              | 1.2691        | 0.9373         | 1.011          | 1.1042        | 1.0503         | 0.837         |
| iMet-X-X-X-Gln | <b>B,( F)</b>           | 0.9008              | 0.808         | 1.4705         | 1.1954         | 0.9742        | 1.0755         | 0.8431        |
| iMet-X-X-X-His | <b>C</b>                | 0.7097              | 0.8245        | 1.0179         | 0.9899         | 0.8986        | 0.8973         | 0.736         |
| iMet-X-X-X-Met | <b>C,E,F</b>            | 0.3302              | 0.4887        | 0.5157         | 0.5165         | 0.586         | 0.5184         | 0.7558        |
| iMet-X-X-X-Tyr | <b>C,E,F</b>            | 0.9289              | 1.0256        | 0.9119         | 0.9619         | 0.832         | 0.8615         | 1.2685        |
| iMet-X-X-X-Lys | <b>C,E</b>              | 1.5613              | 1.38          | 1.0635         | 0.9728         | 0.9448        | 1.4848         | 1.2866        |
| iMet-X-X-X-Phe | <b>C,E</b>              | 1.2578              | 1.2341        | 1.0315         | 1.0893         | 0.9776        | 1.1796         | 1.4513        |



|                |            |        |        |        |        |        |        |        |
|----------------|------------|--------|--------|--------|--------|--------|--------|--------|
| iMet-X-X-X-Ile | <b>C,F</b> | 1.3532 | 1.342  | 1.03   | 1.102  | 1.0858 | 1.3627 | 1.0834 |
| iMet-X-X-X-Leu | <b>C,F</b> | 1.0403 | 1.1196 | 1.1255 | 1.0571 | 0.9891 | 1.1095 | 1.0988 |
| iMet-X-X-X-Arg |            | 0.9585 | 0.9188 | 1.0212 | 1.0777 | 0.964  | 1.1572 | 1.3358 |
| iMet-X-X-X-Pro |            | 0.6365 | 0.6604 | 1.146  | 1.122  | 1.194  | 0.9561 | 0.7926 |
| iMet-X-X-X-Trp |            | 0.5247 | 0.6729 | 0.6218 | 0.5678 | 0.6364 | 0.8219 | 1.0769 |

## Position 6

|                  | <b>NATs</b>             | D. discoideum-revie | D. discoideur | E. histolytica | P. tetraurelia | P. marinus-ur | P. tricornutur | P. falciparum |
|------------------|-------------------------|---------------------|---------------|----------------|----------------|---------------|----------------|---------------|
| iMet-X-X-X-X-Cys | <b>A</b>                | 0.6071              | 0.6276        | 0.7927         | 0.9669         | 0.8253        | 0.8395         | 1.166         |
| iMet-X-X-X-X-Ala | <b>A,(E),(F)</b>        | 0.7974              | 0.7077        | 0.9364         | 0.9036         | 1.0228        | 0.8654         | 0.9816        |
| iMet-X-X-X-X-Gly | <b>A,(F)</b>            | 0.5891              | 0.5917        | 0.7111         | 0.7575         | 0.8858        | 0.6721         | 0.9007        |
| iMet-X-X-X-X-Ser | <b>A,(E),(F)</b>        | 1.2183              | 0.9956        | 1.0669         | 1.2807         | 1.4646        | 1.2413         | 1.1562        |
| iMet-X-X-X-X-Thr | <b>A,(E),(F)</b>        | 0.9471              | 0.9082        | 1.1756         | 1.0106         | 1.1991        | 1.1595         | 1.057         |
| iMet-X-X-X-X-Val | <b>A,( C ), (E),(F)</b> | 1.0104              | 0.9598        | 1.0279         | 0.9288         | 0.9699        | 0.839          | 1.2145        |
| iMet-X-X-X-X-Asp | <b>B</b>                | 0.9212              | 0.8632        | 0.9068         | 0.8174         | 0.8669        | 0.7443         | 0.672         |
| iMet-X-X-X-X-Glu | <b>B</b>                | 0.8639              | 0.8653        | 0.8468         | 0.913          | 0.861         | 0.7318         | 0.8594        |
| iMet-X-X-X-X-Asn | <b>B</b>                | 1.0572              | 1.2119        | 0.9386         | 0.9483         | 0.9677        | 1.023          | 0.7717        |
| iMet-X-X-X-X-Gln | <b>B,( F)</b>           | 0.7982              | 0.7715        | 1.1599         | 1.1008         | 0.9784        | 0.9137         | 0.7669        |
| iMet-X-X-X-X-His | <b>C</b>                | 0.6702              | 0.7974        | 1.2124         | 0.9413         | 0.9728        | 1.0065         | 0.7073        |
| iMet-X-X-X-X-Met | <b>C,E,F</b>            | 0.4677              | 0.4697        | 0.3708         | 0.5165         | 0.5374        | 0.546          | 0.7459        |
| iMet-X-X-X-X-Tyr | <b>C,E,F</b>            | 0.8631              | 0.962         | 0.8377         | 0.8696         | 0.8373        | 0.8546         | 1.0499        |
| iMet-X-X-X-X-Lys | <b>C,E</b>              | 1.4535              | 1.3147        | 0.9632         | 1.0315         | 0.9138        | 1.2926         | 1.0656        |
| iMet-X-X-X-X-Phe | <b>C,E</b>              | 1.0601              | 1.1958        | 1.0641         | 1.0295         | 1.0195        | 1.325          | 1.5677        |
| iMet-X-X-X-X-Ile | <b>C,F</b>              | 1.25                | 1.3349        | 1.0516         | 1.0441         | 0.9537        | 1.2288         | 1.0652        |
| iMet-X-X-X-X-Leu | <b>C,F</b>              | 1.0909              | 1.0855        | 1.1641         | 1.0708         | 0.9558        | 1.2224         | 1.1473        |
| iMet-X-X-X-X-Arg |                         | 0.9745              | 1.0725        | 1.183          | 1.0887         | 1.0408        | 1.1936         | 1.4404        |
| iMet-X-X-X-X-Pro |                         | 0.8                 | 0.6967        | 1.2208         | 1.2367         | 1.2698        | 0.9995         | 0.8532        |
| iMet-X-X-X-X-Trp |                         | 0.6173              | 0.6258        | 1.0271         | 0.6466         | 0.5656        | 0.7362         | 1.0164        |

| T. gondii-unr | G. lamblia-ur | L. donovani | N. gruberi-ur | T. vaginalis-u | A. niger-unre | B. dendrobat | C. albicans-r | C. albicans-u | S. cerevisiae- | S. cerevisiae- |
|---------------|---------------|-------------|---------------|----------------|---------------|--------------|---------------|---------------|----------------|----------------|
| 0.693         | 0.6702        | 0.5857      | 0.469         | 0.364          | 0.4586        | 0.5201       | 0.5446        | 0.4844        | 0.6036         | 0.5989         |
| 1.7932        | 1.1385        | 0.8468      | 1.2852        | 0.8129         | 2.3015        | 1.4048       | 1.6349        | 1.5695        | 1.5638         | 1.4294         |
| 0.8588        | 0.8337        | 0.7907      | 0.9234        | 0.78           | 0.8458        | 0.7728       | 0.6208        | 0.7562        | 0.976          | 0.9339         |
| 0.9391        | 1.6152        | 2.117       | 2.2782        | 2.9769         | 2.0178        | 1.5665       | 2.8482        | 3.0743        | 2.5526         | 2.659          |
| 0.9545        | 1.0402        | 0.9065      | 1.028         | 1.6036         | 1.243         | 1.4806       | 1.1801        | 1.4882        | 1.2124         | 1.3389         |
| 0.722         | 0.5768        | 0.4013      | 0.682         | 0.5457         | 0.6799        | 0.7249       | 0.6788        | 0.8555        | 1.046          | 1.0659         |
| 0.9792        | 1.0571        | 0.7988      | 0.6055        | 0.9142         | 0.9968        | 1.0935       | 0.5465        | 0.6428        | 0.8471         | 0.9053         |
| 1.2052        | 0.907         | 0.8693      | 0.5853        | 0.7603         | 0.8064        | 0.7273       | 0.316         | 0.4946        | 0.777          | 0.6605         |
| 0.966         | 1.0268        | 1.1371      | 1.0347        | 0.9836         | 0.6836        | 1.2072       | 0.7116        | 0.7518        | 0.8619         | 0.8828         |
| 0.9401        | 1.2127        | 1.0785      | 1.077         | 0.9432         | 0.6048        | 0.7376       | 0.4568        | 0.4089        | 0.6208         | 0.6567         |
| 1.1432        | 1.1462        | 0.8888      | 0.7151        | 0.5636         | 0.6543        | 0.9437       | 0.5804        | 0.3854        | 0.6276         | 0.5662         |
| 1.2375        | 0.5198        | 0.807       | 0.8402        | 0.3364         | 0.3876        | 0.3741       | 0.5847        | 0.546         | 0.7736         | 0.6204         |
| 1.0534        | 0.5355        | 0.5835      | 0.5829        | 0.7987         | 0.4795        | 0.8326       | 0.3783        | 0.5166        | 0.4776         | 0.3739         |
| 1.1741        | 0.8023        | 0.9557      | 1.2213        | 0.6546         | 0.8375        | 1.5267       | 1.0628        | 0.7931        | 0.7808         | 0.8159         |
| 0.7767        | 0.8844        | 1.0406      | 0.8458        | 0.8923         | 0.6072        | 0.7395       | 1.1763        | 1.0069        | 0.7313         | 0.7825         |
| 0.7047        | 0.6858        | 0.5127      | 0.6987        | 0.7893         | 0.4098        | 0.6291       | 0.7881        | 0.6981        | 0.5472         | 0.5166         |
| 0.5661        | 0.9472        | 0.9714      | 0.6879        | 1.2134         | 0.5115        | 0.7434       | 0.8438        | 0.6864        | 0.6993         | 0.7016         |
| 0.8941        | 0.9079        | 0.9429      | 0.8774        | 0.7096         | 0.7409        | 0.5981       | 0.8857        | 0.594         | 0.7046         | 0.6772         |
| 0.9236        | 1.7284        | 1.6992      | 1.372         | 0.4156         | 1.4345        | 1.2098       | 0.998         | 1.0773        | 0.9469         | 1.0633         |
| 1.2349        | 0.8077        | 0.939       | 0.5447        | 0.3739         | 0.4723        | 0.3405       | 0.3647        | 0.3055        | 0.8207         | 0.5632         |

| T. gondii-unr | G. lamblia-ur | L. donovani | N. gruberi-ur | T. vaginalis-u | A. niger-unre | B. dendrobat | C. albicans-r | C. albicans-u | S. cerevisiae- | S. cerevisiae- |
|---------------|---------------|-------------|---------------|----------------|---------------|--------------|---------------|---------------|----------------|----------------|
| 0.9915        | 0.8905        | 1.1426      | 0.4878        | 0.701          | 0.7234        | 0.8388       | 0.4765        | 0.632         | 0.7068         | 0.6795         |
| 0.9911        | 1.0017        | 0.9704      | 0.9428        | 1.4363         | 0.9835        | 1.1068       | 0.7647        | 0.7815        | 1.0418         | 1.1075         |
| 0.9963        | 0.9235        | 0.7723      | 0.6806        | 0.7937         | 0.8294        | 0.8128       | 0.6208        | 0.6635        | 0.9025         | 0.8679         |

|        |        |        |        |        |        |        |        |        |        |        |
|--------|--------|--------|--------|--------|--------|--------|--------|--------|--------|--------|
| 0.9903 | 1.2067 | 1.583  | 1.3668 | 1.9214 | 1.753  | 1.2005 | 1.451  | 1.6629 | 1.3587 | 1.3523 |
| 1.4013 | 1.0596 | 1.1163 | 1.2139 | 1.1074 | 1.2868 | 1.1388 | 1.1479 | 1.2784 | 1.0076 | 1.1164 |
| 0.9129 | 0.9855 | 0.6902 | 0.565  | 0.836  | 0.7579 | 0.8528 | 0.8069 | 0.8868 | 0.947  | 0.965  |
| 0.978  | 1.0776 | 0.8505 | 0.6753 | 1.2827 | 0.987  | 1.0017 | 0.8197 | 0.9344 | 0.8834 | 0.9127 |
| 0.6602 | 0.81   | 0.7112 | 0.8496 | 1.2664 | 0.6806 | 0.8282 | 0.79   | 0.8758 | 0.9393 | 0.9683 |
| 1.337  | 0.8556 | 1.0421 | 1.3602 | 1.0176 | 0.9126 | 1.06   | 0.5309 | 0.7776 | 0.9211 | 0.9553 |
| 0.7972 | 0.9317 | 0.8016 | 2.0436 | 0.8974 | 0.9145 | 1.0808 | 1.1499 | 0.9551 | 1.0817 | 1.0622 |
| 1.0564 | 1.0348 | 1.0496 | 1.0426 | 0.7632 | 0.9925 | 0.8194 | 0.8344 | 0.8442 | 0.87   | 0.9027 |
| 0.8904 | 0.614  | 0.4895 | 0.5036 | 0.3051 | 0.5111 | 0.5257 | 0.4177 | 0.598  | 0.7884 | 0.6154 |
| 0.8329 | 0.7299 | 0.7697 | 0.4906 | 0.5534 | 0.7525 | 0.7519 | 0.9879 | 0.8017 | 0.8771 | 0.8284 |
| 1.0733 | 0.898  | 1.1016 | 1.356  | 1.0205 | 0.8585 | 1.0005 | 1.2365 | 1.0606 | 1.1549 | 1.1037 |
| 1.2299 | 1.0696 | 1.0828 | 0.7048 | 0.7962 | 1.0988 | 1.3374 | 1.9312 | 1.3145 | 1.1004 | 1.0406 |
| 1.0028 | 0.8735 | 0.8947 | 0.6904 | 0.4879 | 0.7737 | 0.9171 | 0.8852 | 0.8863 | 0.8447 | 0.8242 |
| 0.9179 | 0.9954 | 0.804  | 0.6887 | 0.7363 | 0.9224 | 1.147  | 1.0837 | 0.8594 | 0.9017 | 0.8651 |
| 1.117  | 1.1365 | 1.6609 | 1.7549 | 1.3097 | 1.0123 | 1.0362 | 1.3385 | 1.4702 | 1.364  | 1.4407 |
| 1.0872 | 1.4279 | 0.9643 | 1.1261 | 0.853  | 1.3615 | 0.7662 | 0.8265 | 0.9124 | 0.8088 | 0.8023 |
| 0.8465 | 1.2774 | 0.6987 | 0.5777 | 0.4882 | 0.7098 | 1.0334 | 0.9482 | 0.6625 | 0.613  | 0.6343 |

T. gondii-unr G. lamblia-ur L. donovani- N. gruberi-ur T. vaginalis-u A. niger-unre B. dendrobat C. albicans-r C. albicans-u S. cerevisiae-S. cerevisiae-

|        |        |        |        |        |        |        |        |        |        |        |
|--------|--------|--------|--------|--------|--------|--------|--------|--------|--------|--------|
| 1.2109 | 0.9277 | 1.3346 | 0.6266 | 0.6922 | 0.7973 | 0.9143 | 0.4765 | 0.3829 | 0.8578 | 0.7112 |
| 0.8644 | 0.9799 | 0.8008 | 0.7135 | 0.6831 | 0.8742 | 1.1015 | 0.9361 | 0.8232 | 0.8444 | 0.8658 |
| 0.7585 | 0.8957 | 0.7732 | 0.5655 | 0.8373 | 0.5882 | 0.6715 | 0.4755 | 0.4898 | 0.6657 | 0.6749 |
| 1.124  | 1.0716 | 1.2315 | 1.2337 | 1.1661 | 1.4258 | 1.2584 | 1.213  | 1.3971 | 1.2217 | 1.2819 |
| 1.2078 | 0.9743 | 1.1495 | 1.2402 | 1.6984 | 1.3473 | 1.3347 | 1.2981 | 1.4371 | 1.118  | 1.1716 |
| 1.0036 | 0.9565 | 0.8803 | 0.7334 | 0.9345 | 0.752  | 0.9848 | 0.7684 | 0.8492 | 0.8976 | 0.9211 |
| 0.7528 | 1.0204 | 0.8271 | 0.7276 | 1.2091 | 0.7614 | 0.7414 | 0.6334 | 0.7823 | 0.8053 | 0.8459 |
| 0.6072 | 0.8365 | 0.7565 | 0.6181 | 0.9524 | 0.7182 | 0.7456 | 0.8013 | 0.8357 | 0.9813 | 0.9643 |
| 1.1576 | 0.8868 | 1.1213 | 1.3    | 0.835  | 1.0905 | 1.0273 | 1.0392 | 0.9709 | 1.0254 | 1.0503 |

|        |        |        |        |        |        |        |        |        |        |        |
|--------|--------|--------|--------|--------|--------|--------|--------|--------|--------|--------|
| 0.9499 | 0.9896 | 0.7781 | 1.7571 | 1.2685 | 1.1028 | 0.9078 | 1.1814 | 1.054  | 1.4485 | 1.1629 |
| 1.1719 | 1.0015 | 0.9401 | 1.7831 | 0.5808 | 1.028  | 0.8332 | 0.7618 | 0.8799 | 0.813  | 0.8716 |
| 0.9089 | 0.6308 | 0.6694 | 0.4834 | 0.5147 | 0.5415 | 0.4954 | 0.3759 | 0.393  | 0.6248 | 0.58   |
| 1.16   | 0.7754 | 1.2564 | 0.6535 | 0.7698 | 0.8162 | 0.9048 | 0.8197 | 0.8546 | 0.8741 | 0.8557 |
| 1.0471 | 1.0136 | 1.413  | 1.0059 | 0.872  | 1.1281 | 0.9615 | 1.1241 | 0.9925 | 1.0592 | 1.0573 |
| 1.3241 | 1.2537 | 1.2801 | 1.0743 | 1.0885 | 1.1169 | 1.0794 | 1.264  | 1.1101 | 1.1434 | 1.084  |
| 1.1375 | 0.9187 | 1.2075 | 0.8314 | 1.11   | 1.0703 | 1.2563 | 1.058  | 1.0005 | 0.9043 | 0.959  |
| 1.0667 | 1.0558 | 0.9104 | 1.1127 | 0.8849 | 0.9652 | 1.0143 | 1.1498 | 0.9796 | 0.9904 | 0.9751 |
| 0.9916 | 1.1994 | 1.2087 | 1.4158 | 1.2429 | 1.0654 | 1.0441 | 1.5156 | 1.3998 | 1.2382 | 1.2382 |
| 1.2577 | 1.2608 | 1.1594 | 1.0101 | 0.7874 | 1.4778 | 1.0031 | 1.1072 | 1.3758 | 1.0824 | 1.1365 |
| 1.0407 | 1.5065 | 0.8887 | 0.5777 | 1.8054 | 0.7099 | 0.7046 | 0.5106 | 0.4138 | 0.8206 | 0.6898 |

|               |               |               |               |                |               |              |               |               |                |                |
|---------------|---------------|---------------|---------------|----------------|---------------|--------------|---------------|---------------|----------------|----------------|
| T. gondii-unr | G. lamblia-ur | L. donovanii- | N. gruberi-ur | T. vaginalis-u | A. niger-unre | B. dendrobat | C. albicans-r | C. albicans-u | S. cerevisiae- | S. cerevisiae- |
| 1.1911        | 0.931         | 1.0658        | 0.6791        | 1.1326         | 0.8034        | 0.6207       | 0.4765        | 0.5573        | 0.8736         | 0.6295         |
| 0.9393        | 0.9155        | 0.9164        | 0.905         | 0.9111         | 0.906         | 1.0057       | 0.7383        | 0.758         | 1.0056         | 0.9356         |
| 0.9376        | 0.9685        | 0.8193        | 0.6581        | 0.7888         | 0.7073        | 0.7893       | 0.5415        | 0.5572        | 0.7309         | 0.7752         |
| 1.095         | 1.0297        | 1.343         | 1.0776        | 1.0761         | 1.2782        | 1.0031       | 1.0978        | 1.2217        | 1.068          | 1.0898         |
| 1.2648        | 0.9808        | 1.2655        | 1.3062        | 1.1729         | 1.3965        | 1.3673       | 1.4912        | 1.4572        | 1.1963         | 1.3142         |
| 1.0443        | 1.0525        | 0.9707        | 0.8855        | 0.8205         | 0.7793        | 1.1634       | 0.8709        | 0.8929        | 1.035          | 1.0265         |
| 0.7175        | 0.9971        | 0.8677        | 0.831         | 0.867          | 0.8398        | 1.1066       | 0.7825        | 0.7577        | 0.7852         | 0.7944         |
| 0.7019        | 0.8928        | 0.7051        | 0.8138        | 1.3387         | 0.7467        | 0.803        | 0.6207        | 0.8528        | 0.8139         | 0.9506         |
| 1.1526        | 0.8676        | 1.0964        | 1.2369        | 0.8794         | 1.1556        | 1.0273       | 1.1521        | 0.999         | 1.0127         | 1.0512         |
| 0.9425        | 0.8989        | 1.0185        | 1.5859        | 0.9117         | 1.1771        | 1.0429       | 1.2601        | 1.0419        | 1.2519         | 1.1688         |
| 1.0575        | 1.0428        | 1.1233        | 1.5097        | 0.8132         | 0.957         | 0.9897       | 0.653         | 0.8006        | 1.141          | 1.1019         |
| 0.9966        | 0.7352        | 0.553         | 0.5266        | 0.4037         | 0.589         | 0.5156       | 0.543         | 0.4396        | 0.476          | 0.4614         |
| 0.9193        | 0.8982        | 0.941         | 0.6933        | 0.6176         | 0.8176        | 0.8709       | 0.9248        | 0.936         | 0.7897         | 0.7753         |
| 1.1794        | 0.9244        | 1.292         | 1.0345        | 0.9758         | 1.2119        | 0.942        | 1.2263        | 1.186         | 1.2757         | 1.2309         |
| 1.0889        | 1.2186        | 1.0144        | 0.8868        | 1.4744         | 0.9125        | 0.9063       | 0.9831        | 1.0007        | 1.0289         | 0.966          |

|        |        |        |        |        |        |        |        |        |        |        |
|--------|--------|--------|--------|--------|--------|--------|--------|--------|--------|--------|
| 1.1762 | 0.9569 | 1.0373 | 0.9288 | 1.2701 | 1.0019 | 1.1281 | 1.1443 | 1.1911 | 1.0332 | 0.9851 |
| 0.9344 | 1.054  | 0.8723 | 0.9975 | 0.931  | 0.9911 | 0.9904 | 1.2574 | 0.9943 | 0.9236 | 0.911  |
| 1.0912 | 1.075  | 1.0323 | 1.0433 | 0.8913 | 1.1831 | 0.9549 | 1.0826 | 1.1955 | 1.1614 | 1.1931 |
| 1.0042 | 1.3351 | 1.1221 | 1.2367 | 0.9887 | 1.2069 | 1.0384 | 0.8889 | 1.1294 | 1.0449 | 1.0569 |
| 0.9279 | 1.604  | 0.6819 | 0.5942 | 0.8235 | 0.7071 | 0.9747 | 0.7294 | 0.5629 | 0.9096 | 0.7939 |

T. gondii-unrϵ G. lamblia-ur L. donovanii- N. gruberi-ur T. vaginalis-u A. niger-unre B. dendrobat C. albicans-rϵ C. albicans-uϵ S. cerevisiae- S. cerevisiae-

|        |        |        |        |        |        |        |        |        |        |        |
|--------|--------|--------|--------|--------|--------|--------|--------|--------|--------|--------|
| 1.4303 | 0.8952 | 1.1938 | 0.6454 | 0.7982 | 0.9419 | 0.8137 | 0.7489 | 0.4779 | 1.0563 | 0.7583 |
| 0.8897 | 0.9242 | 0.8859 | 0.9775 | 1.7632 | 0.9328 | 1.2576 | 0.6592 | 0.814  | 0.9675 | 1.0171 |
| 0.9265 | 0.9493 | 0.7908 | 0.6989 | 1.049  | 0.7498 | 0.7398 | 0.5019 | 0.5407 | 0.829  | 0.8318 |
| 1.1577 | 1.0486 | 1.4175 | 1.4483 | 1.4117 | 1.3044 | 1.082  | 0.9673 | 1.2681 | 1.1782 | 1.2012 |
| 1.0502 | 0.9184 | 1.0478 | 1.304  | 1.1055 | 1.1833 | 1.3097 | 1.1801 | 1.3579 | 1.1713 | 1.2197 |
| 1.1145 | 1.0557 | 0.9631 | 0.8552 | 0.7819 | 0.9    | 1.0375 | 1.0758 | 1.0132 | 1.0258 | 1.009  |
| 0.7306 | 0.8933 | 0.9527 | 0.7899 | 0.7992 | 0.9055 | 0.7611 | 0.4968 | 0.8011 | 0.7398 | 0.8256 |
| 0.6902 | 0.7809 | 0.7798 | 0.7898 | 0.8095 | 0.7884 | 0.8443 | 0.9931 | 0.8742 | 0.8525 | 0.8679 |
| 0.9295 | 0.7697 | 1.0219 | 1.0564 | 0.9487 | 0.9033 | 0.9183 | 1.0053 | 0.9    | 0.9283 | 0.9116 |
| 0.9613 | 1.0177 | 0.8457 | 1.2591 | 0.8709 | 1.0191 | 1.1105 | 0.8978 | 0.9836 | 1.0345 | 1.0845 |
| 1.0227 | 1.0317 | 1.121  | 1.3572 | 0.7859 | 1.0398 | 1.0725 | 1.2697 | 0.9147 | 0.8367 | 0.8815 |
| 0.7169 | 0.7638 | 0.5927 | 0.4949 | 0.5587 | 0.4503 | 0.46   | 0.9189 | 0.3345 | 0.5603 | 0.56   |
| 1.156  | 0.8346 | 0.8169 | 0.6228 | 0.7634 | 0.7256 | 0.7944 | 0.7777 | 0.8911 | 0.7866 | 0.79   |
| 0.9733 | 0.9186 | 1.3742 | 0.9573 | 0.8867 | 1.0214 | 0.955  | 1.2467 | 1.0737 | 1.0341 | 1.0244 |
| 1.1548 | 1.3908 | 0.9662 | 0.8663 | 1.445  | 0.8934 | 0.9975 | 1.0358 | 0.9635 | 1.0766 | 1.0281 |
| 0.9741 | 0.9007 | 1.1008 | 0.9047 | 0.8227 | 1.0486 | 1.1853 | 1.4466 | 1.1609 | 1.0596 | 1.0461 |
| 1.0208 | 1.1861 | 0.9144 | 1.0157 | 0.9078 | 1.1052 | 0.9904 | 1.2326 | 1.0353 | 1.0856 | 0.9606 |
| 1.0969 | 1.1539 | 1.1235 | 1.1546 | 0.8783 | 1.0565 | 0.8998 | 1.1416 | 1.2959 | 1.2132 | 1.3351 |
| 1.1317 | 1.2635 | 1.064  | 1.2702 | 1.2769 | 1.4352 | 1.109  | 1.1072 | 1.2383 | 1.0543 | 1.0943 |
| 1.0395 | 1.5582 | 0.9055 | 0.6272 | 0.4937 | 0.6607 | 0.775  | 0.3647 | 0.595  | 0.9788 | 0.8118 |

| S. pombe-rev | S. pombe-un | A. aegypti-ur | D. rerio-revie | D. rerio-unre | D. melanoga | D. melanoga | G. gallus-revi | G. gallus-unr | H. sapiens-re | M. mulatta-u |
|--------------|-------------|---------------|----------------|---------------|-------------|-------------|----------------|---------------|---------------|--------------|
| 0.2729       | 0.6008      | 0.6542        | 0.362          | 0.4543        | 0.6663      | 0.7908      | 0.49           | 0.5208        | 0.3461        | 0.4592       |
| 1.6682       | 1.8094      | 1.8249        | 3.3175         | 3.1588        | 1.8763      | 1.6008      | 3.5969         | 2.9109        | 3.159         | 3.2613       |
| 0.9959       | 0.6159      | 0.7765        | 1.0149         | 0.998         | 0.8966      | 0.7709      | 1.2544         | 1.3251        | 1.27          | 1.1588       |
| 2.4561       | 2.8991      | 1.6161        | 1.7221         | 1.6308        | 2.1085      | 1.8751      | 1.5453         | 1.4415        | 1.427         | 1.3389       |
| 1.0703       | 1.1513      | 0.9503        | 1.0502         | 0.8765        | 0.9359      | 0.9299      | 0.7118         | 0.9213        | 0.7321        | 0.8294       |
| 0.7116       | 0.699       | 0.7391        | 0.5443         | 0.5569        | 0.7315      | 0.6719      | 0.6868         | 0.5786        | 0.5832        | 0.6908       |
| 1.3041       | 0.8538      | 1.3039        | 1.3343         | 1.3069        | 1.1172      | 1.1742      | 1.0874         | 0.9956        | 1.4777        | 1.1642       |
| 0.9685       | 0.6152      | 1.0638        | 1.2368         | 1.1606        | 0.9004      | 0.9928      | 1.3035         | 1.3883        | 1.5792        | 1.2561       |
| 1.0898       | 0.7181      | 0.9982        | 1.2529         | 0.9206        | 1.068       | 0.9752      | 0.8823         | 0.7568        | 0.9761        | 0.9127       |
| 0.7542       | 0.7712      | 0.6348        | 0.4139         | 0.488         | 0.5201      | 0.7147      | 0.436          | 0.5867        | 0.4938        | 0.5012       |
| 0.4391       | 0.45        | 0.659         | 0.5205         | 0.4027        | 0.5614      | 0.7668      | 0.5654         | 0.6076        | 0.4105        | 0.4439       |
| 0.4972       | 0.7165      | 0.7814        | 0.8381         | 1.167         | 0.8306      | 0.7157      | 0.6338         | 0.6742        | 0.7176        | 0.8281       |
| 0.3304       | 0.5421      | 0.5223        | 0.3006         | 0.4543        | 0.5435      | 0.6065      | 0.3331         | 0.3737        | 0.3245        | 0.3634       |
| 0.9152       | 0.4578      | 1.1865        | 0.6034         | 0.8314        | 0.9997      | 1.1749      | 0.6545         | 0.7398        | 0.742         | 0.7762       |
| 0.765        | 0.6987      | 1.1165        | 0.6584         | 0.7227        | 1.1239      | 1.0395      | 0.4731         | 0.5196        | 0.5086        | 0.5375       |
| 0.4233       | 0.539       | 0.7281        | 0.4226         | 0.4459        | 0.4771      | 0.5506      | 0.2424         | 0.3212        | 0.3322        | 0.3922       |
| 0.5855       | 0.7431      | 0.7565        | 0.4677         | 0.5457        | 0.7283      | 0.7603      | 0.451          | 0.6099        | 0.4787        | 0.5653       |
| 0.716        | 0.5904      | 0.8824        | 0.5062         | 0.7405        | 0.6048      | 0.8718      | 0.8184         | 0.9354        | 0.7317        | 0.775        |
| 0.9257       | 1.1955      | 0.7289        | 0.8683         | 0.8393        | 0.9487      | 0.9202      | 0.8444         | 0.8751        | 0.7674        | 0.8575       |
| 0.3433       | 0.3834      | 1.0582        | 0.5568         | 0.8529        | 0.9314      | 1.1299      | 0.445          | 0.8692        | 0.9653        | 1.0381       |

| S. pombe-rev | S. pombe-un | A. aegypti-ur | D. rerio-revie | D. rerio-unre | D. melanoga | D. melanoga | G. gallus-revi | G. gallus-unr | H. sapiens-re | M. mulatta-u |
|--------------|-------------|---------------|----------------|---------------|-------------|-------------|----------------|---------------|---------------|--------------|
| 0.7148       | 1.0014      | 1.155         | 0.8184         | 0.9285        | 0.8713      | 0.9579      | 0.9611         | 1.0314        | 0.7605        | 0.8789       |
| 0.8741       | 0.8519      | 0.8742        | 1.4203         | 1.3195        | 1.1511      | 1.001       | 1.6659         | 1.7104        | 1.5865        | 1.5217       |
| 0.7789       | 0.6755      | 0.6902        | 1.0432         | 0.9069        | 0.704       | 0.6931      | 1.2864         | 1.0883        | 1.0874        | 1.1047       |

|        |        |        |        |        |        |        |        |        |        |        |
|--------|--------|--------|--------|--------|--------|--------|--------|--------|--------|--------|
| 1.4195 | 1.6984 | 1.3831 | 1.4377 | 1.3334 | 1.2276 | 1.2472 | 1.5347 | 1.2812 | 1.3334 | 1.2903 |
| 1.126  | 1.1952 | 1.1066 | 1.2653 | 1.0827 | 1.3629 | 1.1481 | 1.0493 | 0.9399 | 1.087  | 1.1317 |
| 0.9213 | 0.752  | 0.7438 | 0.898  | 0.892  | 0.6896 | 0.764  | 0.7063 | 0.8042 | 0.8444 | 0.9115 |
| 0.8218 | 1.4111 | 0.9856 | 1.2505 | 1.207  | 1.1809 | 0.9951 | 0.8795 | 0.8839 | 1.007  | 0.939  |
| 1.1231 | 0.8169 | 0.7814 | 0.9982 | 1.0375 | 0.8796 | 0.846  | 1.0309 | 0.9785 | 0.8733 | 0.9265 |
| 1.1156 | 1.3073 | 1.0406 | 0.9597 | 1.0081 | 0.9709 | 1.1107 | 0.9228 | 1.0408 | 0.8916 | 0.8179 |
| 1.0339 | 1.1651 | 0.8435 | 0.785  | 0.8224 | 0.708  | 0.8595 | 0.6919 | 0.8185 | 0.8544 | 0.8012 |
| 0.6248 | 0.9845 | 0.8677 | 0.6856 | 0.7307 | 0.8983 | 0.9429 | 0.8304 | 0.7855 | 0.7377 | 0.7072 |
| 0.5433 | 0.5608 | 0.7687 | 0.8381 | 0.8775 | 0.9061 | 0.869  | 0.8275 | 0.7148 | 0.7508 | 0.8261 |
| 0.8793 | 1.0843 | 0.598  | 0.4689 | 0.5949 | 0.7375 | 0.7926 | 0.3997 | 0.5156 | 0.4321 | 0.45   |
| 1.1581 | 0.8902 | 1.1774 | 0.9515 | 0.8906 | 1.3184 | 1.4211 | 0.8772 | 0.7721 | 0.8508 | 0.8332 |
| 1.2223 | 1.1824 | 1.505  | 0.823  | 1.4295 | 1.2501 | 1.2383 | 0.6712 | 0.8731 | 0.6977 | 0.7625 |
| 0.9026 | 0.5784 | 0.9508 | 0.6113 | 0.6616 | 0.8452 | 0.9271 | 0.5683 | 0.4709 | 0.4865 | 0.5374 |
| 0.857  | 0.7649 | 1.0101 | 0.9004 | 0.9252 | 0.9245 | 0.9753 | 0.8037 | 0.8612 | 0.9684 | 0.9197 |
| 1.1933 | 1.0542 | 1.2725 | 1.0305 | 1.0752 | 1.3181 | 1.2309 | 1.3538 | 1.3551 | 1.2552 | 1.2019 |
| 0.8648 | 1.0422 | 1.0226 | 0.8937 | 0.7331 | 0.8014 | 0.776  | 0.9325 | 1.2275 | 1.2404 | 1.2696 |
| 0.4806 | 0.5751 | 1.0814 | 0.6154 | 1.0087 | 0.7097 | 1.0669 | 1.027  | 0.9447 | 1.0864 | 1.1799 |

S. pombe-rev S. pombe-un A. aegypti-ur D. rerio-revie D. rerio-unre D. melanogaꝛ D. melanogaꝛ G. gallus-revi G. gallus-unr H. sapiens-re M. mulatta-u

|        |        |        |        |        |        |        |        |        |        |        |
|--------|--------|--------|--------|--------|--------|--------|--------|--------|--------|--------|
| 0.6498 | 0.5341 | 0.8597 | 0.9286 | 0.8875 | 0.7047 | 0.8293 | 0.6784 | 1.4278 | 0.7605 | 0.8367 |
| 0.9141 | 0.8821 | 0.8084 | 0.9382 | 1.0119 | 0.8425 | 0.8391 | 1.2797 | 1.2629 | 1.2551 | 1.2771 |
| 0.6316 | 0.9537 | 0.6439 | 0.8448 | 0.806  | 0.578  | 0.6396 | 1.0944 | 1.1286 | 0.9179 | 1.0394 |
| 1.1262 | 1.3587 | 1.1045 | 1.2295 | 1.2259 | 1.1018 | 1.048  | 1.1364 | 0.9606 | 1.1005 | 1.1608 |
| 1.1818 | 1.3925 | 1.0305 | 1.2084 | 1.0291 | 1.1576 | 1.1223 | 0.9246 | 0.7823 | 0.9224 | 0.9902 |
| 0.8832 | 0.8579 | 1.0517 | 1.1484 | 1.0514 | 0.9525 | 0.8987 | 0.9266 | 1.0707 | 0.8412 | 0.8766 |
| 0.761  | 0.8656 | 0.7017 | 0.8186 | 0.7997 | 0.9261 | 0.7526 | 0.5437 | 0.6604 | 0.6406 | 0.679  |
| 0.9306 | 0.6253 | 0.7263 | 0.8131 | 0.8191 | 0.7788 | 0.7977 | 0.8591 | 0.8506 | 0.8238 | 0.8784 |
| 1.2886 | 1.3257 | 1.0998 | 0.9064 | 0.9416 | 0.9806 | 1.1363 | 0.8214 | 0.8128 | 1.1115 | 0.8236 |

|        |        |        |        |        |        |        |        |        |        |        |
|--------|--------|--------|--------|--------|--------|--------|--------|--------|--------|--------|
| 1.1088 | 1.0338 | 0.8236 | 0.8421 | 0.8959 | 0.8654 | 0.9172 | 0.7772 | 0.8184 | 0.9919 | 0.841  |
| 0.9035 | 0.9563 | 0.8606 | 0.876  | 0.7974 | 0.9242 | 0.8577 | 0.8657 | 1.0305 | 0.6938 | 0.7521 |
| 0.5985 | 0.4673 | 0.8143 | 0.9598 | 0.9432 | 0.7268 | 0.8246 | 0.8099 | 0.8492 | 0.7736 | 1.1264 |
| 1.0697 | 1.0585 | 0.8668 | 1.0581 | 0.8447 | 1.1956 | 0.9908 | 0.7861 | 0.7609 | 0.6171 | 0.6719 |
| 1.2618 | 0.8394 | 1.1135 | 0.9805 | 1.0139 | 1.1453 | 1.3018 | 0.7962 | 0.8015 | 0.8948 | 0.9006 |
| 1.0768 | 1.0749 | 1.4466 | 1.2802 | 1.1062 | 1.509  | 1.3455 | 1.1443 | 0.9653 | 1.0778 | 0.9131 |
| 0.9586 | 0.8019 | 1.5319 | 0.8981 | 1.1954 | 1.2042 | 1.2197 | 0.6519 | 0.6755 | 0.8371 | 0.7022 |
| 1.0082 | 1.0053 | 1.2219 | 0.9353 | 1.0601 | 1.1771 | 1.2034 | 1.1207 | 1.2278 | 1.148  | 1.0758 |
| 1.1072 | 1.0331 | 1.1221 | 1.2353 | 1.1699 | 1.0428 | 1.1084 | 1.6061 | 1.3018 | 1.439  | 1.3798 |
| 1.0028 | 1.3692 | 0.8457 | 1.0268 | 0.9737 | 1.0266 | 0.9331 | 1.3658 | 1.2383 | 1.2448 | 1.2706 |
| 0.6523 | 0.4313 | 1.1276 | 0.8498 | 1.2614 | 1.0645 | 1.2423 | 1.3008 | 1.2284 | 1.3103 | 1.2592 |

| S. pombe-rev | S. pombe-un | A. aegypti-ur | D. rerio-revie | D. rerio-unre | D. melanoga | D. melanoga | G. gallus-revi | G. gallus-unr | H. sapiens-re | M. mulatta-u |
|--------------|-------------|---------------|----------------|---------------|-------------|-------------|----------------|---------------|---------------|--------------|
| 0.7278       | 1.2029      | 1.1174        | 1.1017         | 0.8606        | 0.7816      | 0.9854      | 0.9611         | 0.902         | 0.8287        | 0.9381       |
| 0.8095       | 0.9882      | 0.903         | 1.0834         | 1.0664        | 0.9814      | 0.8724      | 1.3085         | 1.33          | 1.2401        | 1.275        |
| 0.8486       | 0.8152      | 0.8249        | 1.1679         | 1.0716        | 0.8448      | 0.7598      | 1.408          | 1.4969        | 1.2933        | 1.3086       |
| 1.0855       | 1.4467      | 1.0782        | 1.0933         | 1.1212        | 0.9759      | 1.0388      | 1.1045         | 1.1122        | 1.0443        | 1.0743       |
| 1.1539       | 1.3167      | 0.9763        | 1.0249         | 1.0209        | 1.2069      | 1.114       | 0.976          | 0.8147        | 1.0857        | 1.0671       |
| 0.8864       | 0.9432      | 1.1029        | 1.0668         | 1.149         | 0.9563      | 0.9762      | 1.121          | 0.954         | 1.0425        | 1.0053       |
| 0.8539       | 0.7712      | 0.7979        | 0.9669         | 0.7848        | 0.8071      | 0.7929      | 0.7356         | 0.7562        | 0.6972        | 0.8098       |
| 1.0414       | 0.9083      | 0.8394        | 0.9349         | 0.9381        | 0.9283      | 0.871       | 0.8413         | 0.8198        | 0.8113        | 0.8379       |
| 1.2702       | 1.124       | 0.9853        | 0.9774         | 0.909         | 1.034       | 1.0441      | 0.8113         | 0.6268        | 0.9222        | 0.8885       |
| 1.2537       | 0.8702      | 0.8222        | 0.8064         | 0.8244        | 0.8042      | 0.9808      | 0.8245         | 1.017         | 0.9911        | 0.8228       |
| 0.9203       | 1.4071      | 0.697         | 0.711          | 0.8464        | 0.6823      | 0.8566      | 0.53           | 0.744         | 0.6953        | 0.6685       |
| 0.4788       | 0.4052      | 0.7839        | 1.0139         | 0.9333        | 1.0477      | 0.8397      | 0.8099         | 0.9           | 0.7841        | 0.9245       |
| 0.8009       | 0.8266      | 1.0636        | 0.6974         | 0.7024        | 0.8928      | 0.8292      | 0.6262         | 0.5367        | 0.6793        | 0.6139       |
| 1.3862       | 1.0308      | 1.0932        | 1.2532         | 1.406         | 1.5152      | 1.3157      | 1.1268         | 0.8377        | 1.0339        | 1.031        |
| 0.9936       | 0.735       | 1.1923        | 1.1156         | 0.9803        | 0.9345      | 1.0574      | 0.8912         | 0.9745        | 0.8262        | 0.8329       |



|        |        |        |        |        |        |        |        |        |        |        |
|--------|--------|--------|--------|--------|--------|--------|--------|--------|--------|--------|
| 1.0022 | 0.9208 | 1.2719 | 0.8226 | 0.9089 | 1.1406 | 1.1342 | 0.6101 | 0.9523 | 0.7252 | 0.6806 |
| 0.8919 | 0.9039 | 1.1411 | 0.9249 | 1.0109 | 1.0766 | 1.1462 | 0.951  | 1.0229 | 0.9938 | 1.0151 |
| 1.1972 | 1.0549 | 1.175  | 1.0425 | 1.1687 | 1.1972 | 1.2063 | 1.4838 | 1.3665 | 1.2763 | 1.3005 |
| 0.8567 | 1.1145 | 0.9023 | 0.8303 | 0.6987 | 0.8014 | 0.8297 | 0.9032 | 0.9813 | 1.1056 | 1.0347 |
| 0.7724 | 0.6714 | 0.9194 | 1.348  | 1.1625 | 0.998  | 1.4462 | 1.3693 | 1.162  | 1.4042 | 1.2811 |

| S. pombe-rev | S. pombe-un | A. aegypti-ur | D. rerio-revie | D. rerio-unre | D. melanoga | D. melanoga | G. gallus-revi | G. gallus-unr | H. sapiens-re | M. mulatta-u |
|--------------|-------------|---------------|----------------|---------------|-------------|-------------|----------------|---------------|---------------|--------------|
| 0.9877       | 0.7343      | 1.0392        | 0.9286         | 0.9704        | 1.0507      | 1.1379      | 1.451          | 1.1432        | 1.0129        | 0.9531       |
| 0.8464       | 1.0103      | 1.0012        | 1.1248         | 1.0449        | 1.1048      | 0.9829      | 1.4468         | 1.4839        | 1.2116        | 1.2636       |
| 0.7828       | 0.8444      | 0.7312        | 1.0205         | 0.9363        | 0.867       | 0.8149      | 1.2672         | 1.2093        | 1.1179        | 1.1812       |
| 1.1975       | 1.3982      | 1.0789        | 1.1774         | 1.1245        | 1.1969      | 1.027       | 1.2373         | 1.0517        | 1.1422        | 1.0974       |
| 1.1191       | 1.3487      | 1.0461        | 0.9806         | 0.9371        | 0.977       | 0.9223      | 0.6384         | 0.6971        | 0.9799        | 0.9005       |
| 0.9086       | 0.8791      | 1.4109        | 1.143          | 1.1698        | 1.0516      | 1.1494      | 0.959          | 0.9878        | 1.017         | 1.0208       |
| 0.7789       | 0.83        | 0.8277        | 1.0056         | 0.8728        | 0.8581      | 0.8473      | 0.8955         | 1.0345        | 0.8696        | 0.8467       |
| 0.9364       | 0.595       | 0.8529        | 0.9203         | 1.116         | 0.8066      | 0.8549      | 0.8413         | 0.8425        | 0.9475        | 0.841        |
| 0.9978       | 1.4177      | 0.8991        | 0.8708         | 0.8069        | 1.1699      | 1.0444      | 0.6186         | 0.7526        | 0.679         | 0.6794       |
| 0.984        | 1.1815      | 0.8577        | 0.8207         | 0.8934        | 0.8479      | 0.8514      | 0.7866         | 0.9812        | 0.8808        | 0.8804       |
| 0.819        | 1.097       | 0.6828        | 0.6348         | 0.7219        | 0.6564      | 0.7719      | 0.7774         | 0.7463        | 0.6423        | 0.6835       |
| 0.4972       | 0.3427      | 0.7283        | 0.757          | 0.8944        | 0.8212      | 0.7179      | 0.6338         | 0.6439        | 0.7404        | 0.7936       |
| 0.8793       | 0.7745      | 0.8649        | 0.7455         | 0.878         | 0.8462      | 0.845       | 0.5463         | 0.5846        | 0.7346        | 0.62         |
| 1.4602       | 1.0556      | 1.0476        | 1.0792         | 1.0262        | 1.2122      | 1.2245      | 0.9717         | 1.0771        | 0.9844        | 0.9423       |
| 1.031        | 0.8241      | 1.0376        | 1.0973         | 1.1024        | 1.1491      | 1.1122      | 0.9793         | 0.9139        | 0.8367        | 0.8741       |
| 1.0707       | 0.7888      | 1.1611        | 0.9585         | 0.9481        | 1.0588      | 1.2085      | 0.5767         | 0.6515        | 0.7228        | 0.6839       |
| 1.016        | 0.8669      | 1.2247        | 1.0191         | 1.05          | 1.1452      | 1.1848      | 1.1877         | 1.0102        | 1.069         | 1.155        |
| 1.162        | 1.2229      | 1.0974        | 1.1992         | 1.1752        | 1.0261      | 1.1327      | 1.3461         | 1.395         | 1.3003        | 1.3008       |
| 0.8485       | 1.2568      | 0.8244        | 0.8747         | 0.8583        | 0.7104      | 0.819       | 1.0721         | 1.0067        | 1.1487        | 1.1955       |
| 0.8582       | 0.4313      | 0.9426        | 0.8498         | 0.9245        | 0.9536      | 1.1786      | 0.8216         | 1.0865        | 1.2016        | 1.2423       |

| M. gallopavo | M. musculus | M. musculus | T. castaneum | X. tropicalis-r | X. tropicalis-t | E. hellem-un | E. bieneusi-u | N. parisii-unr | N. bombycis- | V. corneae-ui |
|--------------|-------------|-------------|--------------|-----------------|-----------------|--------------|---------------|----------------|--------------|---------------|
| 0.6235       | 0.3337      | 0.4934      | 0.7714       | 0.3617          | 0.3631          | 0.3349       | 0.7078        | 0.8184         | 0.5478       | 0.4677        |
| 2.5885       | 3.5434      | 2.7386      | 2.2922       | 3.8678          | 3.5629          | 1.2066       | 1.1762        | 1.2691         | 1.3947       | 1.3715        |
| 1.1196       | 1.1666      | 1.1067      | 1.0828       | 1.1287          | 1.1819          | 1.1725       | 1.1704        | 0.9682         | 0.7559       | 0.8556        |
| 1.6415       | 1.4232      | 1.3215      | 1.9291       | 1.6758          | 1.591           | 1.064        | 1.1968        | 0.9276         | 1.3076       | 1.2089        |
| 1.4033       | 0.7882      | 0.9185      | 1.0285       | 0.8469          | 0.7553          | 0.7251       | 0.9528        | 0.708          | 1.0417       | 0.8529        |
| 0.6556       | 0.5577      | 0.7084      | 0.7141       | 0.5574          | 0.6295          | 0.5592       | 1.0031        | 0.6566         | 0.7534       | 0.789         |
| 1.1626       | 1.2108      | 1.398       | 1.1758       | 1.244           | 1.2552          | 1.6094       | 1.1867        | 1.4286         | 1.0593       | 1.2193        |
| 1.2496       | 1.411       | 1.4059      | 0.98         | 1.4011          | 1.3451          | 1.6466       | 1.0721        | 1.2107         | 0.7906       | 1.2201        |
| 0.8655       | 0.8378      | 1.0046      | 1.0135       | 0.782           | 0.8104          | 1.5613       | 0.9804        | 1.3529         | 1.2588       | 1.192         |
| 0.5322       | 0.423       | 0.5147      | 0.6225       | 0.4828          | 0.4839          | 0.8496       | 1.2698        | 1.6401         | 1.1246       | 1.3503        |
| 0.4514       | 0.3956      | 0.4163      | 0.7108       | 0.4491          | 0.5722          | 0.7247       | 0.9856        | 1.9475         | 1.1648       | 1.2449        |
| 0.6564       | 0.7327      | 0.8655      | 0.6415       | 0.5726          | 0.5831          | 0.2984       | 0.4854        | 0.4158         | 0.6735       | 0.3084        |
| 0.2531       | 0.2775      | 0.4382      | 0.5803       | 0.3696          | 0.3771          | 0.3154       | 0.9091        | 0.6052         | 0.6064       | 0.436         |
| 0.8647       | 0.8003      | 0.8569      | 0.9151       | 0.5831          | 0.7507          | 1.5841       | 1.1219        | 1.6785         | 1.3611       | 1.2475        |
| 0.6085       | 0.4912      | 0.7141      | 0.8873       | 0.4954          | 0.6065          | 0.6258       | 1.1579        | 0.822          | 0.932        | 0.8013        |
| 0.382        | 0.3046      | 0.4578      | 0.4692       | 0.3655          | 0.3308          | 0.7681       | 0.9072        | 0.4046         | 0.9563       | 0.7166        |
| 0.5894       | 0.4974      | 0.588       | 0.5987       | 0.4059          | 0.5437          | 0.6035       | 0.7217        | 0.6028         | 0.7356       | 0.8119        |
| 0.7433       | 0.6983      | 0.7905      | 0.8322       | 0.5471          | 0.6058          | 1.0049       | 0.8388        | 1.3825         | 1.1105       | 0.9939        |
| 0.8985       | 0.8664      | 0.8565      | 0.92         | 0.8389          | 1.0142          | 1.0153       | 0.9025        | 0.8593         | 0.9564       | 1.6222        |
| 0.788        | 1.0079      | 1.0175      | 1.0196       | 0.985           | 0.811           | 0.509        | 0.9333        | 1.0281         | 0.8864       | 0.8296        |

| M. gallopavo | M. musculus | M. musculus | T. castaneum | X. tropicalis-r | X. tropicalis-t | E. hellem-un | E. bieneusi-u | N. parisii-unr | N. bombycis- | V. corneae-ui |
|--------------|-------------|-------------|--------------|-----------------|-----------------|--------------|---------------|----------------|--------------|---------------|
| 1.0949       | 0.8344      | 0.8176      | 0.9629       | 0.8068          | 0.8378          | 0.8758       | 0.9101        | 1.1199         | 0.8739       | 0.7249        |
| 1.3805       | 1.6793      | 1.3945      | 0.9956       | 1.6357          | 1.5474          | 0.7894       | 0.6992        | 0.7481         | 0.799        | 0.7434        |
| 0.9109       | 1.1068      | 1.07        | 0.8611       | 1.3054          | 1.1763          | 0.9715       | 0.9828        | 0.8169         | 0.4462       | 0.8775        |

|        |        |        |        |        |        |        |        |        |        |        |
|--------|--------|--------|--------|--------|--------|--------|--------|--------|--------|--------|
| 1.44   | 1.3662 | 1.3614 | 1.3072 | 1.2917 | 1.3813 | 1.0574 | 0.9705 | 0.9575 | 1.0652 | 1.2032 |
| 1.0206 | 1.1544 | 1.1936 | 1.1038 | 1.2761 | 1.0719 | 1.1704 | 0.9469 | 1.0419 | 0.9866 | 1.2694 |
| 0.8279 | 0.7705 | 0.8516 | 0.9268 | 0.8019 | 0.8344 | 0.7736 | 0.9906 | 0.9529 | 0.8687 | 0.7808 |
| 1.2948 | 0.9436 | 0.8949 | 1.0641 | 1.0983 | 1.0836 | 0.9919 | 0.9681 | 0.7901 | 0.7766 | 0.8388 |
| 0.9185 | 0.9421 | 0.9229 | 0.9958 | 1.1539 | 1.0774 | 1.3074 | 1.2288 | 1.1455 | 0.8228 | 1.1803 |
| 1.5872 | 0.7557 | 1.031  | 0.9392 | 0.8255 | 0.8403 | 1.0689 | 1.2458 | 1.2195 | 1.1438 | 1.1759 |
| 0.784  | 0.7786 | 0.8459 | 0.9665 | 0.6932 | 0.7868 | 1.0562 | 0.8791 | 1.2687 | 1.1656 | 1.366  |
| 0.8654 | 0.7148 | 0.7548 | 0.996  | 0.4491 | 0.84   | 0.7537 | 0.7755 | 0.8666 | 1.002  | 1.1951 |
| 0.7182 | 0.7273 | 0.9186 | 0.4937 | 0.3817 | 0.7424 | 0.4564 | 0.638  | 0.6274 | 0.6936 | 0.6373 |
| 0.5511 | 0.4466 | 0.5311 | 0.7223 | 0.642  | 0.5711 | 0.7541 | 0.767  | 0.9604 | 0.8351 | 0.7872 |
| 0.912  | 0.8087 | 0.8926 | 1.0916 | 0.8052 | 0.8932 | 1.2765 | 1.3166 | 1.0499 | 1.0268 | 1.1393 |
| 0.9346 | 0.8128 | 0.8357 | 1.0422 | 0.9133 | 0.8983 | 1.0183 | 1.2544 | 0.9301 | 1.5265 | 1.0037 |
| 0.5332 | 0.4732 | 0.6696 | 0.7936 | 0.5726 | 0.5728 | 0.9091 | 0.9231 | 1.2462 | 1.1637 | 1.0254 |
| 0.8897 | 0.9089 | 0.9111 | 1.0049 | 0.9634 | 0.9278 | 0.9363 | 0.8801 | 0.7577 | 1.1534 | 0.8357 |
| 1.0746 | 1.3001 | 1.186  | 1.2917 | 1.0395 | 1.1746 | 1.2196 | 0.96   | 1.5762 | 1.04   | 1.0155 |
| 0.785  | 1.1427 | 1.033  | 0.92   | 1.0568 | 0.9208 | 0.6158 | 0.7154 | 0.6234 | 0.8931 | 0.8187 |
| 1.0425 | 1.2201 | 1.3475 | 0.8178 | 0.8295 | 0.9406 | 1.8904 | 1.1555 | 0.9995 | 0.9249 | 1.0785 |

M. gallopavo M. musculus M. musculus T. castaneum X. tropicalis-r X. tropicalis-t E. hellem-unı E. bieneusi-u N. parisii-unr N. bombycis- V. corneae-ui

|        |        |        |        |        |        |        |        |        |        |        |
|--------|--------|--------|--------|--------|--------|--------|--------|--------|--------|--------|
| 0.9564 | 0.8662 | 0.9026 | 0.86   | 1.1406 | 0.9352 | 0.6955 | 0.6741 | 0.7861 | 0.9652 | 0.6781 |
| 0.9679 | 1.3949 | 1.1812 | 0.8695 | 1.2471 | 1.1804 | 0.9473 | 0.7156 | 0.709  | 0.9532 | 1.1936 |
| 0.882  | 0.9746 | 0.9642 | 0.7141 | 0.9619 | 0.9013 | 0.7956 | 0.9678 | 0.7996 | 0.6876 | 0.8336 |
| 1.0953 | 1.1985 | 1.1389 | 1.1969 | 1.1242 | 1.1282 | 0.9008 | 1.2521 | 1.1508 | 0.9814 | 1.0264 |
| 0.8501 | 0.9724 | 0.9566 | 1.0682 | 1.2083 | 0.9237 | 0.9032 | 0.9883 | 1.1388 | 1.138  | 1.2694 |
| 1.0638 | 0.8845 | 0.9549 | 0.9897 | 0.9975 | 0.9655 | 0.8732 | 1.1097 | 1.0135 | 0.7658 | 0.9679 |
| 0.6894 | 0.7053 | 0.7    | 0.7746 | 1.0087 | 0.709  | 0.9451 | 0.8494 | 0.7622 | 0.9048 | 0.8215 |
| 0.7994 | 0.8215 | 0.8623 | 0.8196 | 0.9643 | 0.9074 | 1.3074 | 0.7931 | 1.0327 | 0.896  | 1.0609 |
| 0.8549 | 0.8099 | 0.858  | 1.081  | 0.9558 | 0.9324 | 1.0689 | 1.1259 | 1.0258 | 1.1127 | 0.9503 |

|        |        |        |        |        |        |        |        |        |        |        |
|--------|--------|--------|--------|--------|--------|--------|--------|--------|--------|--------|
| 0.8969 | 0.8597 | 1.0196 | 0.9169 | 0.7923 | 1.0197 | 1.4006 | 0.8888 | 1.3059 | 1.1985 | 1.4288 |
| 0.8466 | 0.7426 | 0.8713 | 0.905  | 0.4266 | 0.799  | 0.8697 | 0.8402 | 0.8852 | 0.9644 | 1.0209 |
| 0.9302 | 0.8172 | 0.9944 | 0.6248 | 0.4056 | 0.7669 | 0.6143 | 0.6241 | 0.569  | 0.7841 | 0.7606 |
| 0.8639 | 0.6873 | 0.8738 | 0.8696 | 0.7782 | 0.9171 | 0.6307 | 0.7599 | 0.7148 | 0.9096 | 0.7024 |
| 0.9938 | 0.8715 | 0.8993 | 1.1267 | 0.7959 | 0.9711 | 1.2896 | 1.3201 | 1.1941 | 1.0006 | 1.1621 |
| 0.9739 | 0.9296 | 1.062  | 1.3124 | 1.0681 | 0.9371 | 0.944  | 1.4112 | 1.0052 | 1.3731 | 0.8772 |
| 0.9064 | 0.6676 | 0.8313 | 1.0871 | 0.7919 | 0.8758 | 1.1134 | 0.885  | 0.9229 | 0.9815 | 0.8856 |
| 1.4437 | 1.1006 | 1.0836 | 1.1537 | 1.0906 | 1.0757 | 1.1394 | 0.9153 | 1.055  | 1.2283 | 1.0841 |
| 1.2808 | 1.3211 | 1.2045 | 1.1911 | 1.2036 | 1.2747 | 1.0221 | 1.0345 | 1.4366 | 0.9048 | 0.9939 |
| 1.0041 | 1.3263 | 1.1339 | 0.906  | 1.2529 | 1.2447 | 0.8322 | 1.1556 | 0.8874 | 0.8439 | 1.0158 |
| 1.4239 | 1.36   | 1.4726 | 0.855  | 0.9331 | 1.3533 | 0.5817 | 0.8    | 1.0566 | 0.6552 | 0.6637 |

| M. gallopavo | M. musculus | M. musculus | T. castaneum | X. tropicalis-r | X. tropicalis-ι | E. hellem-unι | E. bieneusi-u | N. parisii-unr | N. bombycis- | V. corneae-ui |
|--------------|-------------|-------------|--------------|-----------------|-----------------|---------------|---------------|----------------|--------------|---------------|
| 0.9426       | 0.9377      | 0.8985      | 0.9286       | 0.9459          | 0.9327          | 0.6182        | 0.9944        | 0.8184         | 0.913        | 0.8886        |
| 0.977        | 1.3215      | 1.1407      | 0.9122       | 1.2109          | 1.1246          | 0.733         | 0.8474        | 0.8656         | 0.7219       | 0.9528        |
| 1.0984       | 1.3351      | 1.1404      | 0.8589       | 1.3643          | 1.3546          | 0.5946        | 0.7881        | 0.7478         | 0.7034       | 0.7349        |
| 1.1315       | 1.0611      | 1.0097      | 1.0984       | 1.2289          | 1.1016          | 0.9726        | 0.9507        | 0.8217         | 0.8887       | 1.0492        |
| 0.929        | 0.956       | 1.086       | 1.0427       | 0.8695          | 0.9761          | 1.094         | 1.0302        | 1.0687         | 1.1197       | 1.1405        |
| 0.9107       | 1.0196      | 0.9892      | 1.097        | 1.1344          | 1.1168          | 0.9805        | 0.9344        | 1.1044         | 1.0046       | 0.8622        |
| 1.0491       | 0.7462      | 0.7692      | 0.8305       | 0.7733          | 0.9029          | 1.0761        | 0.8747        | 0.6385         | 0.7464       | 0.8302        |
| 0.8537       | 0.8324      | 0.84        | 0.9482       | 1.1539          | 0.9496          | 1.1224        | 0.8667        | 1.1831         | 0.814        | 1.2333        |
| 0.754        | 0.8049      | 1.3726      | 1.0204       | 0.6082          | 0.8934          | 0.8287        | 1.2419        | 0.8574         | 0.9977       | 0.9181        |
| 1.4101       | 0.861       | 0.8832      | 0.9679       | 1.0275          | 0.8386          | 1.1481        | 1.2018        | 1.5534         | 0.9194       | 1.4288        |
| 0.8655       | 0.694       | 0.7096      | 0.8509       | 0.6512          | 0.7363          | 1.1885        | 0.8241        | 0.9598         | 1.0646       | 1.1951        |
| 0.9714       | 0.9262      | 0.9439      | 0.7029       | 0.8112          | 0.8649          | 0.5968        | 0.6381        | 0.7733         | 0.9449       | 0.6167        |
| 0.6306       | 0.6179      | 0.6254      | 0.7726       | 0.7976          | 0.6938          | 0.809         | 0.6821        | 0.8815         | 0.9043       | 0.763         |
| 1.0833       | 0.9876      | 0.9884      | 1.1092       | 0.9162          | 1.0472          | 1.3158        | 1.2214        | 1.2955         | 1.1645       | 1.1848        |
| 1.2725       | 0.872       | 0.9007      | 1.0998       | 0.8205          | 0.9558          | 1.0713        | 1.1402        | 0.8643         | 1.2044       | 1.1724        |

|        |        |        |        |        |        |        |        |        |        |        |
|--------|--------|--------|--------|--------|--------|--------|--------|--------|--------|--------|
| 0.6547 | 0.6989 | 0.8505 | 1.0691 | 0.865  | 0.8554 | 1.1487 | 1.0725 | 0.9108 | 1.151  | 0.9788 |
| 1.0447 | 1.0483 | 1.054  | 1.0758 | 0.9876 | 1.0125 | 1.0548 | 1.1375 | 0.9683 | 1.1489 | 0.9647 |
| 1.1299 | 1.3347 | 1.2154 | 1.1991 | 1.1489 | 1.1898 | 1.1423 | 0.839  | 1.6573 | 1.1575 | 1.0479 |
| 0.971  | 0.9926 | 0.9865 | 0.9002 | 0.7626 | 0.8003 | 0.8488 | 0.87   | 0.8481 | 0.9424 | 0.6822 |
| 1.1571 | 1.4854 | 1.6223 | 0.9718 | 1.4516 | 1.3676 | 1.236  | 0.8007 | 1.2565 | 1.002  | 0.9955 |

| M. gallopavo | M. musculus | M. musculus | T. castaneum | X. tropicalis-r | X. tropicalis-u | E. hellem-un | E. bieneusi-u | N. parisii-unr | N. bombycis- | V. corneae-u |
|--------------|-------------|-------------|--------------|-----------------|-----------------|--------------|---------------|----------------|--------------|--------------|
| 1.3378       | 1.0383      | 1.0011      | 0.9514       | 1.3075          | 0.9968          | 0.7985       | 0.7921        | 1.1199         | 0.9652       | 1.0289       |
| 1.12         | 1.3527      | 1.1032      | 0.9518       | 1.22            | 1.1411          | 0.9473       | 0.9788        | 0.8343         | 0.6588       | 0.9004       |
| 0.9207       | 1.1521      | 1.0669      | 0.8311       | 1.3545          | 1.1077          | 0.7119       | 0.8328        | 0.9812         | 0.7821       | 0.691        |
| 0.9638       | 1.1365      | 1.0798      | 1.1079       | 1.0962          | 1.0399          | 0.9334       | 0.9152        | 0.8677         | 0.9485       | 1.0321       |
| 0.8398       | 0.9384      | 0.9761      | 0.9083       | 0.926           | 0.8561          | 1.2085       | 0.9587        | 1.1789         | 0.8994       | 1.3487       |
| 1.0217       | 0.9919      | 1.0233      | 1.2237       | 1.0855          | 1.1472          | 0.9498       | 1.0282        | 0.8418         | 0.7823       | 0.8459       |
| 1.511        | 0.863       | 0.926       | 1.0015       | 1.0311          | 0.8895          | 0.7673       | 1.1305        | 0.7462         | 0.7954       | 0.7783       |
| 0.9081       | 0.8662      | 0.9204      | 0.9121       | 1.0879          | 0.948           | 1.1594       | 0.9546        | 1.118          | 0.858        | 1.0012       |
| 1.0392       | 0.6325      | 0.8255      | 0.9129       | 0.8834          | 0.8104          | 1.0328       | 0.9804        | 0.8352         | 1.1625       | 0.9826       |
| 1.0716       | 0.8148      | 0.9187      | 0.9359       | 0.7551          | 1.1053          | 1.4466       | 1.0256        | 1.2502         | 1.2723       | 1.1933       |
| 0.7465       | 0.6477      | 0.7763      | 0.7649       | 0.6736          | 0.6867          | 1.0146       | 1.0502        | 0.587          | 0.8141       | 0.8466       |
| 0.5884       | 0.7355      | 0.8302      | 0.6248       | 0.5487          | 0.6762          | 0.4037       | 0.7906        | 0.4888         | 0.6534       | 0.4111       |
| 0.6754       | 0.6288      | 0.775       | 0.8175       | 0.5447          | 0.7175          | 0.9461       | 0.8594        | 1.1139         | 0.7819       | 0.9204       |
| 1.0389       | 0.9415      | 0.9678      | 1.018        | 1.0273          | 1.0994          | 1.3288       | 1.0405        | 1.3203         | 1.0378       | 1.2703       |
| 0.9623       | 0.8832      | 0.916       | 1.1698       | 0.9598          | 0.9644          | 1.0077       | 1.375         | 0.9864         | 1.3923       | 1.0121       |
| 0.7555       | 0.7057      | 0.9164      | 1.0671       | 0.7188          | 0.8533          | 0.9866       | 1.0563        | 1.0876         | 1.2978       | 0.9846       |
| 1.068        | 1.1465      | 1.1204      | 1.1353       | 0.9573          | 1.0687          | 1.224        | 1.0597        | 0.9208         | 1.1988       | 1.1557       |
| 1.1882       | 1.2844      | 1.2555      | 1.1374       | 1.1489          | 1.2649          | 0.919        | 0.6897        | 1.4861         | 0.9871       | 0.9507       |
| 0.8962       | 1.1131      | 0.9969      | 0.9445       | 0.9697          | 0.9996          | 0.7323       | 1.0896        | 0.7357         | 0.8861       | 0.8945       |
| 1.1572       | 1.2057      | 1.0826      | 0.8922       | 1.1405          | 0.9885          | 0.8725       | 0.8           | 0.9424         | 0.4625       | 1.3274       |

A. thaliana-r A. thaliana-u C. variabilis-l O. sativa-revi O. sativa-unr O. tauri-unre P. patens-unr P. trichocarp Z. mays-unreview

|        |        |        |        |        |        |        |        |        |
|--------|--------|--------|--------|--------|--------|--------|--------|--------|
| 0.2385 | 0.5112 | 0.5348 | 0.2517 | 0.383  | 0.4458 | 0.735  | 0.428  | 0.579  |
| 3.7558 | 2.8571 | 1.5991 | 3.6189 | 3.4103 | 1.5332 | 2.3441 | 3.2679 | 2.7716 |
| 1.2739 | 1.3301 | 0.8093 | 1.1447 | 1.2101 | 0.9174 | 1.3801 | 1.4452 | 1.143  |
| 1.2542 | 1.1369 | 1.5653 | 1.3178 | 0.9846 | 2.6196 | 0.9122 | 1.0154 | 1.0055 |
| 0.8929 | 0.9171 | 1.0586 | 0.6698 | 0.7972 | 1.3464 | 0.8044 | 0.8757 | 0.8222 |
| 0.7558 | 0.8582 | 0.8306 | 0.5755 | 0.8279 | 0.4649 | 0.9793 | 0.7949 | 0.7436 |
| 1.3617 | 1.178  | 0.8785 | 1.4632 | 1.1991 | 1.0917 | 1.3936 | 1.3048 | 1.2363 |
| 1.7029 | 1.5039 | 0.9219 | 1.83   | 1.5821 | 0.5781 | 1.8147 | 1.7476 | 1.3907 |
| 0.7781 | 0.792  | 0.8576 | 0.4002 | 0.4684 | 0.788  | 0.6886 | 0.6625 | 0.6199 |
| 0.5251 | 0.6723 | 1.1968 | 0.5601 | 0.6    | 0.3338 | 0.8017 | 0.6993 | 0.7532 |
| 0.2352 | 0.5655 | 0.7823 | 0.2499 | 0.4719 | 0.7012 | 0.5323 | 0.517  | 0.654  |
| 0.9488 | 0.7531 | 0.2583 | 0.9417 | 0.5093 | 0.2381 | 0.3451 | 0.7025 | 0.7326 |
| 0.3702 | 0.5117 | 0.3465 | 0.2379 | 0.286  | 0.3339 | 0.5956 | 0.437  | 0.5556 |
| 0.9152 | 0.8369 | 0.7856 | 0.4876 | 0.5437 | 0.5657 | 0.7179 | 0.8526 | 0.6256 |
| 0.3336 | 0.5544 | 0.5273 | 0.2304 | 0.2554 | 0.7546 | 0.5431 | 0.453  | 0.4759 |
| 0.4147 | 0.553  | 0.4705 | 0.3204 | 0.2722 | 0.5107 | 0.4319 | 0.5204 | 0.4691 |
| 0.2941 | 0.4823 | 0.705  | 0.2724 | 0.3572 | 0.3938 | 0.4459 | 0.4722 | 0.5353 |
| 0.6428 | 0.7445 | 0.9293 | 0.4844 | 0.65   | 1.2598 | 0.8737 | 0.5928 | 0.6775 |
| 0.4834 | 0.7132 | 1.2319 | 0.6137 | 0.9255 | 1.8631 | 0.8521 | 0.6726 | 0.9169 |
| 0.3279 | 0.5783 | 0.6081 | 0.3195 | 0.6595 | 0.3928 | 1.5688 | 0.5429 | 0.6644 |

A. thaliana-r A. thaliana-u C. variabilis-l O. sativa-revi O. sativa-unr O. tauri-unre P. patens-unr P. trichocarp Z. mays-unreview

|        |        |        |        |        |        |        |        |        |
|--------|--------|--------|--------|--------|--------|--------|--------|--------|
| 0.7429 | 0.9185 | 0.9407 | 0.7153 | 0.8332 | 0.7119 | 0.9505 | 1.0407 | 1.0382 |
| 0.9834 | 1.1663 | 1.2117 | 1.4682 | 1.4153 | 1.3532 | 1.0443 | 0.9962 | 1.319  |
| 0.8232 | 0.9449 | 0.9038 | 1.0205 | 1.044  | 0.6824 | 0.9316 | 0.9661 | 1.0262 |

|        |        |        |        |        |        |        |        |        |
|--------|--------|--------|--------|--------|--------|--------|--------|--------|
| 1.7025 | 1.476  | 1.3908 | 1.901  | 1.4158 | 1.5389 | 1.5954 | 1.572  | 1.4777 |
| 1.586  | 1.3494 | 1.2184 | 1.2978 | 1.2983 | 1.7525 | 1.2654 | 1.4493 | 1.2762 |
| 0.6422 | 0.7676 | 0.8795 | 0.6143 | 0.7873 | 0.7455 | 0.8796 | 0.7587 | 0.7213 |
| 0.8014 | 0.8281 | 0.9646 | 0.7927 | 0.8001 | 1.0529 | 0.7837 | 0.8178 | 0.7903 |
| 0.9358 | 0.9289 | 0.8048 | 0.7698 | 0.9112 | 0.458  | 0.9838 | 0.9799 | 0.807  |
| 1.2544 | 1.0269 | 1.0607 | 0.7559 | 0.7469 | 0.8065 | 1.3103 | 0.9848 | 0.778  |
| 0.8323 | 0.8357 | 0.9076 | 0.8567 | 0.8281 | 0.65   | 0.8411 | 0.8112 | 0.8499 |
| 0.7217 | 0.7643 | 0.8927 | 0.6727 | 0.7849 | 0.9109 | 0.9331 | 0.7495 | 0.8799 |
| 1.2244 | 1.027  | 0.5222 | 1.1952 | 1.152  | 0.4903 | 0.8906 | 1.0396 | 1.108  |
| 0.5432 | 0.6069 | 0.4807 | 0.3489 | 0.5799 | 0.5032 | 0.6207 | 0.6247 | 0.6191 |
| 1.1342 | 1.104  | 1.082  | 0.9086 | 0.8665 | 0.7142 | 0.8751 | 1.0258 | 0.8527 |
| 0.8185 | 0.8538 | 0.6703 | 0.635  | 0.6825 | 0.6491 | 0.7511 | 0.9587 | 0.7441 |
| 0.9328 | 0.8176 | 0.7986 | 0.636  | 0.7284 | 0.7317 | 0.9293 | 0.8927 | 0.7359 |
| 0.7954 | 0.8033 | 0.8442 | 0.7158 | 0.7303 | 0.8302 | 0.8616 | 0.8343 | 0.7965 |
| 1.2517 | 1.2395 | 1.1624 | 1.4028 | 1.2672 | 1.6603 | 0.9983 | 1.2224 | 1.2246 |
| 0.7728 | 1.0097 | 1.1656 | 1.0928 | 1.1661 | 1.1881 | 1.0993 | 0.8258 | 1.1914 |
| 0.5371 | 0.7389 | 0.7407 | 0.7632 | 0.9404 | 0.5461 | 0.8545 | 0.7892 | 0.9106 |

A. thaliana-r A. thaliana-u C. variabilis-l O. sativa-revi O. sativa-unr O. tauri-unre P. patens-unr P. trichocarp Z. mays-unreview

|        |        |        |        |        |        |        |        |        |
|--------|--------|--------|--------|--------|--------|--------|--------|--------|
| 0.9267 | 0.9793 | 0.9923 | 0.9007 | 0.8926 | 0.8557 | 1.088  | 1.1101 | 1.1113 |
| 0.8639 | 1.1324 | 1.0169 | 1.5959 | 1.3842 | 1.4224 | 0.9355 | 0.9624 | 1.3387 |
| 0.7711 | 0.8709 | 0.7899 | 1.124  | 1.0791 | 0.7243 | 0.9359 | 0.8444 | 0.9939 |
| 1.5413 | 1.3092 | 1.1783 | 1.5015 | 1.2482 | 1.1563 | 1.1245 | 1.2485 | 1.2768 |
| 1.3135 | 1.1853 | 1.3626 | 1.0327 | 1.1702 | 1.4226 | 0.9881 | 1.2735 | 1.1624 |
| 0.822  | 0.8861 | 0.9283 | 0.6983 | 0.9063 | 0.9331 | 0.8863 | 0.8165 | 0.8431 |
| 0.6573 | 0.7398 | 0.7975 | 0.6325 | 0.7149 | 1.1176 | 0.7372 | 0.6747 | 0.7375 |
| 0.9939 | 0.8975 | 0.7727 | 0.8603 | 0.8708 | 0.6124 | 1.0507 | 0.9792 | 0.8351 |
| 1.0636 | 0.9513 | 0.9196 | 0.7622 | 0.6896 | 0.8697 | 1.1273 | 0.9892 | 0.7414 |

|        |        |        |        |        |        |        |        |        |
|--------|--------|--------|--------|--------|--------|--------|--------|--------|
| 1.1229 | 0.9121 | 0.988  | 1.0017 | 0.9547 | 0.6809 | 1.8259 | 1.0816 | 0.9622 |
| 0.828  | 0.9642 | 0.9528 | 0.7688 | 0.9327 | 0.863  | 0.8614 | 0.9187 | 0.9425 |
| 0.8891 | 0.8768 | 0.5054 | 0.7968 | 0.7926 | 0.5371 | 0.7711 | 0.9282 | 0.8304 |
| 0.6455 | 0.8348 | 0.6763 | 0.6105 | 0.6364 | 0.7694 | 0.7436 | 0.7867 | 0.7052 |
| 1.0685 | 1.0527 | 1.0856 | 0.7934 | 0.8703 | 0.7048 | 1.0927 | 1.0678 | 0.8389 |
| 0.9698 | 1.008  | 0.985  | 0.8092 | 0.7558 | 0.7942 | 0.8555 | 1.0458 | 0.8507 |
| 1.0009 | 0.9224 | 0.9151 | 0.7915 | 0.6954 | 0.8638 | 0.8108 | 1.0092 | 0.7745 |
| 1.0107 | 0.9621 | 1.0825 | 0.8347 | 0.9057 | 0.7749 | 0.987  | 1.029  | 0.9401 |
| 1.1378 | 1.1272 | 1.1188 | 1.3176 | 1.1953 | 1.518  | 1.1585 | 1.0393 | 1.1125 |
| 0.9198 | 1.0709 | 1.3453 | 1.1222 | 1.2645 | 1.1909 | 0.8864 | 1.0535 | 1.2336 |
| 0.6163 | 0.8008 | 0.8732 | 0.5502 | 0.9872 | 0.5653 | 0.9338 | 0.8569 | 0.9802 |

A. thaliana-r A. thaliana-u C. variabilis-l O. sativa-revi O. sativa-unr O. tauri-unre P. patens-unr P. trichocarp Z. mays-unreview

|        |        |        |        |        |        |        |        |        |
|--------|--------|--------|--------|--------|--------|--------|--------|--------|
| 0.9189 | 0.9915 | 1.1212 | 0.8875 | 0.8727 | 0.6903 | 1.0772 | 1.1442 | 1.0418 |
| 0.854  | 1.1359 | 1.0147 | 1.4436 | 1.3839 | 1.3471 | 0.9652 | 0.9461 | 1.2748 |
| 0.8721 | 1.0193 | 0.9644 | 1.3281 | 1.2383 | 0.8129 | 1.1121 | 0.9003 | 1.1181 |
| 1.4104 | 1.2456 | 1.0971 | 1.2245 | 1.1782 | 1.1777 | 1.0832 | 1.2395 | 1.1856 |
| 1.178  | 1.1673 | 1.3495 | 1.2467 | 1.0791 | 1.4686 | 0.9005 | 1.2548 | 1.0991 |
| 0.8619 | 0.9317 | 1.0295 | 0.8664 | 0.9619 | 0.9804 | 1.038  | 0.8897 | 0.8492 |
| 0.7515 | 0.774  | 0.8937 | 0.6494 | 0.7319 | 1.1103 | 0.933  | 0.7012 | 0.729  |
| 0.9041 | 0.8526 | 0.869  | 0.9018 | 0.8457 | 0.6676 | 0.8894 | 0.8486 | 0.8373 |
| 1.1011 | 0.9917 | 0.9309 | 0.6796 | 0.7136 | 0.7099 | 1.1449 | 1.0848 | 0.7879 |
| 1.096  | 0.9781 | 1.0141 | 0.9489 | 0.8796 | 0.6853 | 1.485  | 1.1227 | 0.9448 |
| 0.8699 | 0.8643 | 1.003  | 0.8842 | 0.9553 | 0.9229 | 0.8044 | 0.9433 | 0.9744 |
| 0.9829 | 0.9046 | 0.6795 | 0.8511 | 0.8324 | 0.5604 | 0.726  | 0.8615 | 0.8901 |
| 0.6308 | 0.7054 | 0.626  | 0.6819 | 0.5729 | 0.5516 | 0.7461 | 0.7707 | 0.6886 |
| 1.2841 | 1.0677 | 1.2356 | 1.2012 | 0.9123 | 0.686  | 1.0194 | 1.2181 | 0.9259 |
| 0.9551 | 0.965  | 0.8829 | 0.5732 | 0.7197 | 0.8436 | 0.8564 | 1.0265 | 0.7807 |



|        |        |        |        |        |        |        |        |        |
|--------|--------|--------|--------|--------|--------|--------|--------|--------|
| 0.9695 | 0.9003 | 0.8202 | 0.5041 | 0.692  | 0.9384 | 0.9921 | 0.9306 | 0.7519 |
| 0.9239 | 0.9011 | 0.989  | 0.8867 | 0.8632 | 0.8005 | 0.9829 | 0.9495 | 0.9318 |
| 1.2707 | 1.235  | 1.0886 | 1.244  | 1.3008 | 1.533  | 1.112  | 1.1344 | 1.2164 |
| 0.8531 | 0.9983 | 0.9754 | 1.0045 | 1.1439 | 1.0098 | 0.8096 | 0.9447 | 1.2133 |
| 0.6615 | 0.9008 | 0.998  | 0.6744 | 0.999  | 0.7665 | 1.1183 | 0.8898 | 1.0057 |

A. thaliana-r A. thaliana-u C. variabilis-l O. sativa-revi O. sativa-unr O. tauri-unre P. patens-unr P. trichocarp Z. mays-unreview

|        |        |        |        |        |        |        |        |        |
|--------|--------|--------|--------|--------|--------|--------|--------|--------|
| 1.044  | 1.1684 | 1.0889 | 0.9404 | 0.9681 | 0.8773 | 1.0518 | 1.1606 | 1.206  |
| 0.9132 | 1.1399 | 1.0377 | 1.505  | 1.3538 | 1.4339 | 1.143  | 0.941  | 1.2299 |
| 0.7591 | 0.9875 | 0.9583 | 1.2423 | 1.2117 | 0.8112 | 1.1106 | 0.8945 | 1.0577 |
| 1.4423 | 1.2768 | 1.2076 | 1.3412 | 1.212  | 1.2763 | 1.0143 | 1.3189 | 1.233  |
| 1.1137 | 0.9905 | 1.166  | 1.0606 | 1.0219 | 1.2405 | 1.1662 | 1.0927 | 1.0238 |
| 0.9345 | 1.0274 | 0.9842 | 0.9246 | 0.9943 | 0.9252 | 1.1019 | 0.9632 | 0.9362 |
| 0.8808 | 0.8094 | 0.8937 | 0.7885 | 0.7925 | 1.0345 | 0.7825 | 0.7626 | 0.7791 |
| 0.9906 | 0.8835 | 0.8218 | 1.1056 | 0.9002 | 0.6546 | 0.8416 | 0.8888 | 0.8184 |
| 1.0864 | 0.8853 | 0.7447 | 0.7114 | 0.6659 | 0.7211 | 0.7964 | 0.9684 | 0.7414 |
| 1.0129 | 0.9459 | 0.9498 | 0.9555 | 0.859  | 0.7556 | 1.0463 | 1.0658 | 0.8788 |
| 0.8377 | 0.888  | 0.9528 | 1.0668 | 0.8601 | 0.869  | 0.9278 | 1.0141 | 1.037  |
| 0.7386 | 0.8421 | 0.4605 | 0.7606 | 0.7833 | 0.523  | 0.8003 | 0.75   | 0.8348 |
| 0.6552 | 0.706  | 0.6987 | 0.3964 | 0.5565 | 0.5565 | 0.6758 | 0.8099 | 0.6186 |
| 1.0801 | 1.0356 | 1.3177 | 0.7402 | 0.8568 | 0.6977 | 1.0189 | 1.1111 | 0.9061 |
| 1.0137 | 0.9696 | 0.8338 | 0.5395 | 0.7155 | 0.6064 | 0.8041 | 1.0478 | 0.7542 |
| 1.0022 | 0.8928 | 0.9238 | 0.5512 | 0.6923 | 0.8293 | 0.9548 | 0.9073 | 0.7771 |
| 0.9959 | 0.9517 | 1.0302 | 0.9957 | 0.9315 | 0.8204 | 0.8681 | 1.0201 | 0.9799 |
| 1.1582 | 1.1815 | 1.1406 | 1.2478 | 1.2644 | 1.638  | 1.127  | 1.082  | 1.235  |
| 0.8653 | 1.0174 | 1.0818 | 0.87   | 1.149  | 1.1525 | 1.4259 | 0.9602 | 1.2161 |
| 0.718  | 0.9342 | 0.7875 | 0.7277 | 0.9517 | 0.7282 | 1.0132 | 0.8898 | 0.8722 |

**Supplementary figure 1. All six major human NAT complexes (NatA-F) were most likely present in the Last Eukaryotic Common Ancestor (LECA).**

Catalytic and regulatory subunits of all six major human NATs complexes were identified across the eukaryotic tree of life, suggesting they were all present in the LECA. NATs subunit orthologs were identified in 73 species representative of the eukaryotic tree of life<sup>59-63</sup>. Results are indicated according to reciprocal blastp E-value score ("filled dot"= E-value score lower than  $e^{-8}$ ; "open dot"= E-value score between  $e^{-8}$ - $e^{-03}$ ; "no dot"= E-value score more than  $e^{-03}$ ). Known subunits of *H. sapiens* NATs were used as reference for bidirectional blastp, except in the case of fungi where *S. cerevisiae* NATs were used instead<sup>9, 83</sup>. Black dot indicates NAT was identified using *H. sapiens* ortholog; orange dot indicates that NAT was identified using *S. cerevisiae* ortholog; green, red, yellow and blue dots indicate that NATs were identified, respectively, using the phylogenetically closest plant, chromalveolata, excavate and microsporidia species ortholog. In the case of species-specific gene duplication, the number of dots is equivalent to the number of identified NAT paralogs. Phylogenetic distribution shown in this figure was previously reported<sup>59-63</sup>.

**Supplementary figure 2. Identified orthologs of Naa10 and Naa50 are most likely catalytically active.**

Three major catalytically active residues in Naa10 ( $\alpha 1$ - $\alpha 2$  loop 'E';  $\beta 5$  helix 'R';  $\beta 6$ -7 helix 'Y') and two in Naa50 ( $\beta 4$  helix 'Y';  $\beta 5$  helix 'H') were recently described<sup>64, 65</sup>. Presence of the key catalytically active residues of Naa10 (E, R, Y; Glutamic acid, Arginine, and Tyrosine) and Naa50 (Y, H; Tyrosine and Histidine) is indicated for 27 species representative of the eukaryotic tree of life. Substitution of these canonical catalytically active residues is displayed by showing a distinct amino acid at the respective position. Phylogenetic distribution shown in this figure was previously reported<sup>59-63</sup>.

**Supplementary figure 3. Identified orthologs of Naa10 and Naa50 in fungi, microsporidia, and excavata are most likely catalytically active.**

Three major catalytically active residues in Naa10 ( $\alpha$ 1– $\alpha$ 2 loop ‘E’;  $\beta$ 5 helix ‘R’;  $\beta$ 6-7 helix ‘Y’) and two in Naa50 ( $\beta$ 4 helix ‘Y’;  $\beta$ 5 helix ‘H’) were recently described<sup>64, 65</sup>. Presence of the key catalytically active residues of Naa10 (E, R, Y; Glutamic acid, Arginine, and Tyrosine) and Naa50 (Y, H; Tyrosine and Histidine) is indicated for 29 species (thirteen fungi, ten microsporidia, six excavata). Substitution of these canonical catalytically active residues is displayed by showing a distinct amino acid at the respective position. Phylogenetic distribution shown in this figure was previously reported<sup>59-63</sup>.

**Supplementary figure 4. Orthologs of Naa10 were not identified in several species of birds.**

Orthologs of Naa10 (the catalytic subunit of NatA) were not identified in *Gallus gallus* (chicken), *Meleagris gallopavo* (turkey), *Taenopygia guttata*, *Ficedula albicollis*, and *Melopsittacus undulatus* (budgerigar). This absence was further confirmed by HMMER (data not shown). Naa10 orthologs were nevertheless identified in *Falco cherrug* (falcon) and *Anas platyrhynchos* (duck). Orthologs for Naa15 (regulatory subunit of NatA) and all other NATs subunits were identified in seven avian species representative of the major clades of birds phylogenetic tree<sup>91</sup>. Results are indicated according to reciprocal blastp E-value score ("filled dot"= E-value score lower than  $e^{-8}$ ; "open dot"= E-value score between  $e^{-8}$ - $e^{-03}$ ; "no dot"= E-value score higher than  $e^{-03}$ ). In the case of species-specific gene duplication events, the number of dots is equivalent to the number of identified paralogs. Phylogenetic distribution shown in this figure was previously reported<sup>60, 63, 91</sup>.

**Supplementary figure 5. Lack of detectable residue usage frequency bias for the N-terminal third, fourth, fifth and sixth position.**

Fold enrichment heat maps of each amino acid usage frequency at the N-terminal third (A), fourth (B), fifth (C), and sixth (D) positions when compared to the total proteome. When compared to the N-terminal second position (Fig.

5), the N-terminal third, fourth, fifth, and sixth residues positions show significantly less amino acid usage frequency biases across the eukaryotic tree of life. Amino acid usage frequency bias for each N-terminal position was analyzed by calculating the amino acid usage frequency for each position divided by its frequency in the total proteome (for more experimental detail see material and methods). The fold enrichment heat map shows the over-representation range ( $>1$ ) of each amino acid at the N-terminal third/fourth/fifth/sixth positions when compared to the total proteome. For each species and for each amino acid, it was attributed a black color ( $\leq 1.0$ ) when the amino acid is under-represented in the N-terminal third/fourth/fifth/sixth positions compared to its total proteome usage frequency. A detailed breakdown of the values used in this heat map is shown in Supplementary Table 2.

**Supplementary table 1.** Protein accession numbers and reciprocal blastp E-value scores for all identified NATs.

**Supplementary table 2.** Fold enrichment values of each amino acid at the N-terminal second, third, fourth, fifth, and sixth positions when compared to total proteome usage.
